# Supplementary material
Source: PubMed Central journal article supplement (PMC3230241)
Supplement: NIHMS328213-supplement-2.pdf [file NIHMS328213-supplement-2.pdf]

## **SUPPLEMENTARY DATA**

**Supplementary Figure 1.** Identification and elimination of statistical outliers. **(a)** Kernel density plot of difference (D) from duplicate observations for each kinase-inhibitor pair. The estimated double exponential density (y-axis) is plotted against D (x-axis). The grey vertical lines represent one standard deviation on either side of the mean of the distribution of D. **(b)** Quantile-quantile plot of D from duplicate observations for each kinase-inhibitor pair. Quantiles of the estimated double exponential distribution (y-axis) are plotted against D (x-axis). **(c)** Kernel density plot of the coefficient of variation (CV) from duplicate observations for each kinase-inhibitor pair. The estimated log-normal density (y-axis) is plotted against CV (x-axis). **(d)** Quantile-quantile plot of CV from duplicate observations for each kinase-inhibitor pair. Quantiles of the estimated log-normal distribution (y-axis) are plotted against CV (x-axis). **(e)** A scatter plot of CV versus D for all kinase-inhibitor pairs. The green and black circles that lie inside the band formed by the red vertical lines represent observations within one standard deviation of the mean of the estimated double exponential distribution of D. These observations were considered to be within acceptable noise levels in assay measurements and were retained for further analyses of compound activity. The pink horizontal line represents the CV threshold for outlier detection. The blue circles represent observations whose CV exceeded this threshold and were identified as outliers. **(f)** A scatter plot of the kinase activity in replicate 1 versus replicate 2 for all kinase-inhibitor pairs. Data points in black represent the identified outliers that were removed from the final data.

# Supplementary Figure 1

**a**

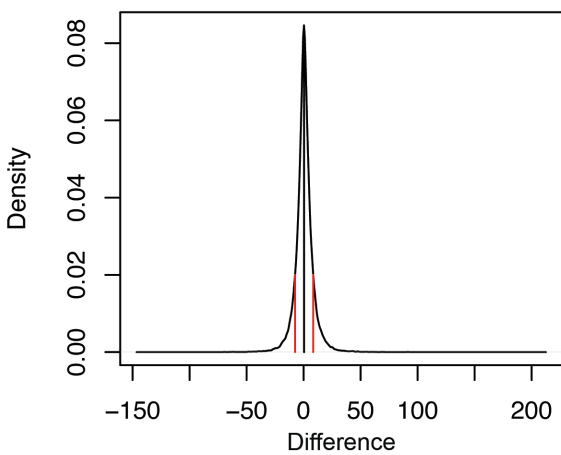

**b**

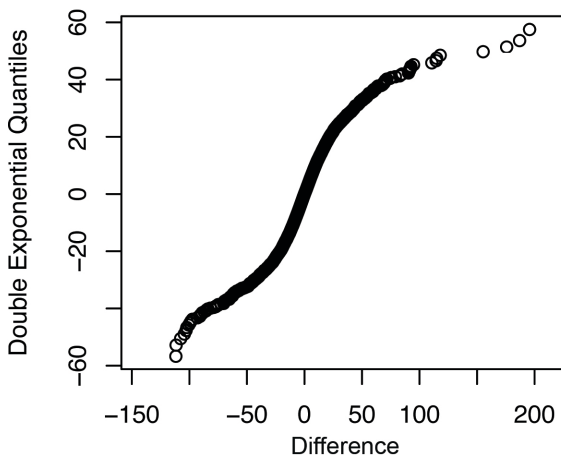

**c**

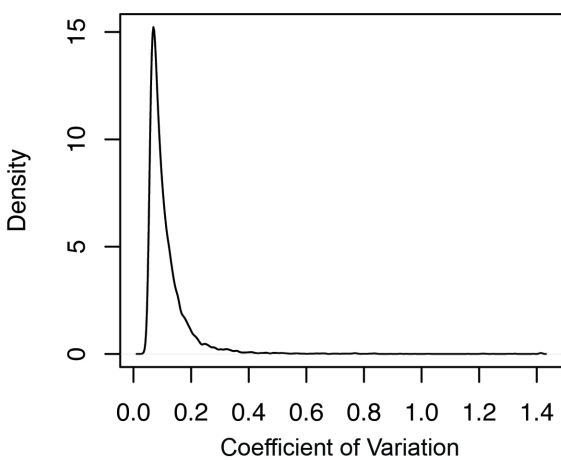

**d**

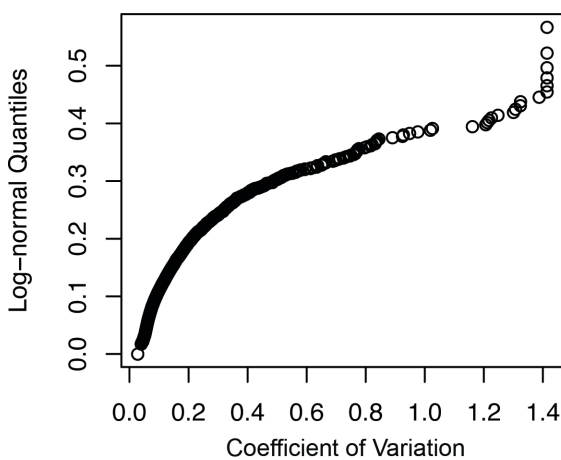

**e**

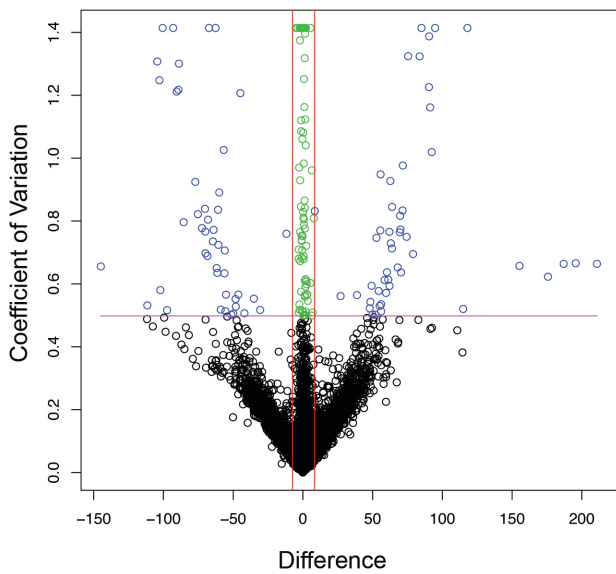

**f**

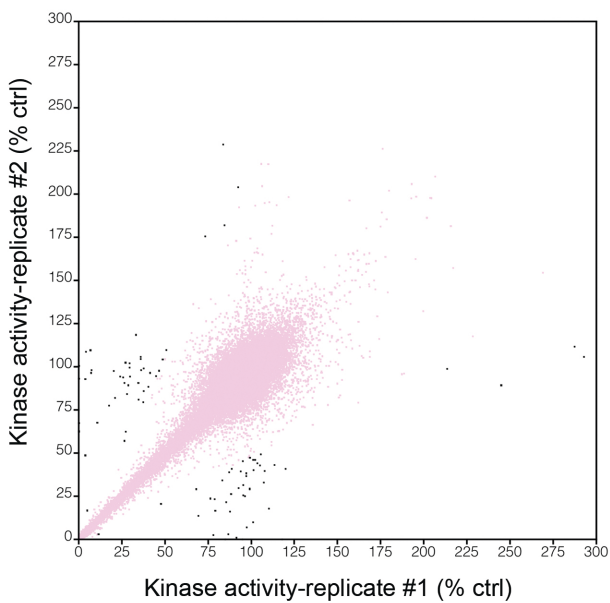

**Supplementary Figure 2.** A high-resolution version of **Figure 1d** showing two-way hierarchical clustering analysis of the entire kinase-inhibitor interaction network presented as a heatmap of inhibitory activity.





**Supplementary Figure 3.** Kinase inhibitors frequently inhibit kinases outside of the subfamily containing their intended targets. All compounds intended to target a kinase in the indicated specific subfamily of kinases were analyzed as to whether the kinases they inhibit fall within the subfamily of their intended target (blue) or outside of that family (red, percent of total shown). The final pie chart presents aggregate data for all of the subfamilies presented. “n” reports the number of compounds analyzed for each target subfamily. The following compound types were not included in this analysis: compounds intended to target lipid kinases, inactive control compounds, compounds intended to target kinases from multiple subfamilies, compounds that did not inhibit any kinases. For example, none of the four compounds intended to target STE subfamily kinases inhibited any kinases significantly.

# Supplementary Figure 3

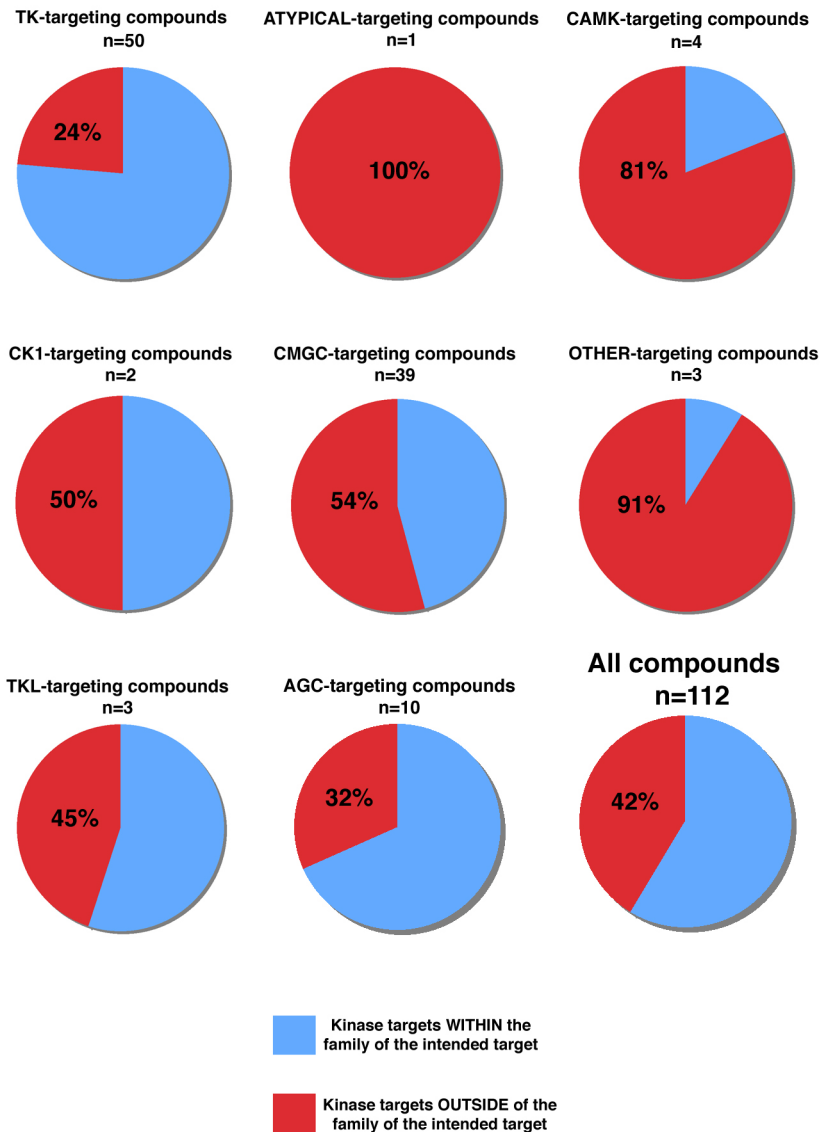

**Supplementary Figure 4.** No single physicochemical property correlates with inhibitor selectivity. All 178 test compounds were analyzed with regard to molecular weight, predicted LogP, polar surface area (PSA), number of hydrogen bond acceptors, and number of hydrogen bond donors. These features are plotted for each compound as a function of inhibitor selectivity from the screening data reported either as Gini score (from Supplementary Table 5) or as Selectivity score ( $S_{(50\%)}$ ). The Selectivity score of a compound corresponds to the number of kinases that it inhibited by at least 50% divided by the number of kinases against which the compound was tested. More selective inhibitors are associated with lower Selectivity scores and higher Gini scores.

# Supplementary Figure 4

Molecular Weight vs Gini score

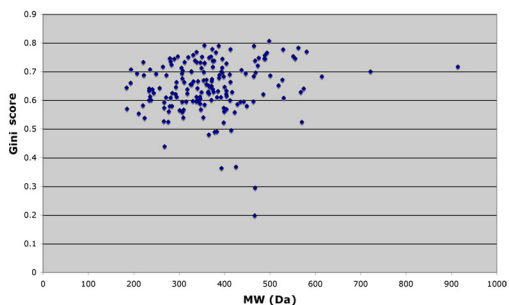

Molecular Weight vs Selectivity score

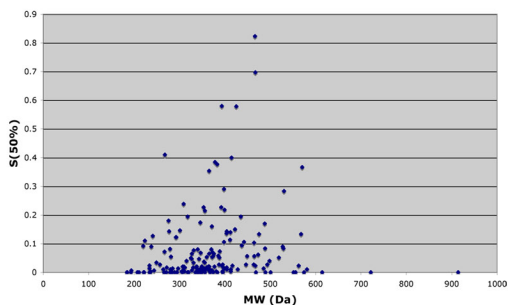

LogP vs Gini score

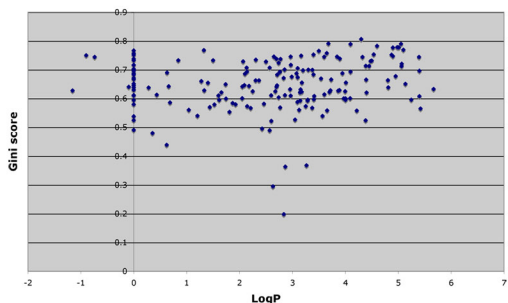

LogP vs Selectivity score

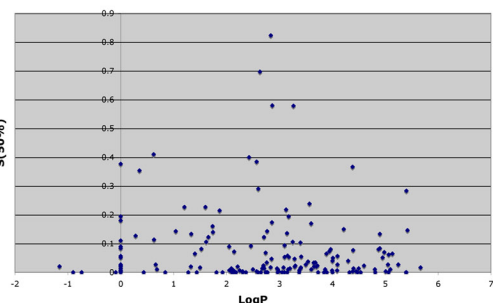

Polar surface area vs Gini score

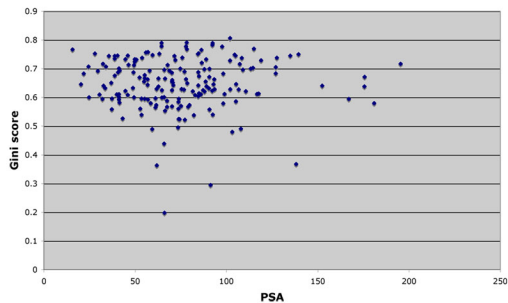

Polar surface area vs Selectivity score

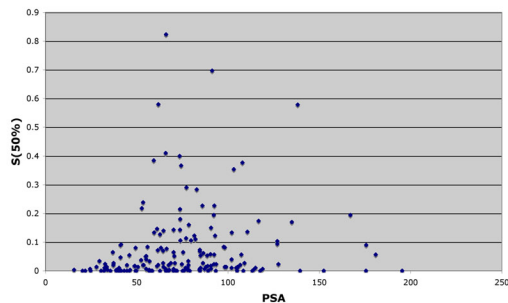

H bond acceptor vs Gini score

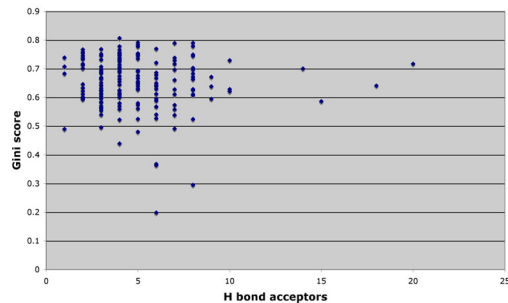

H bond acceptor vs Selectivity score

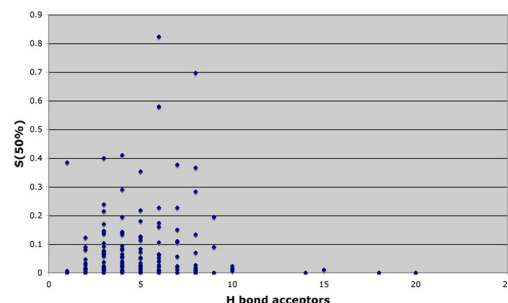

H bond donor vs Gini score

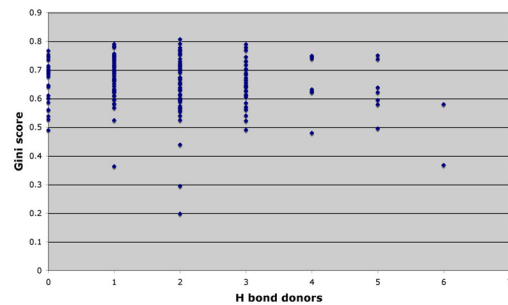

H bond donor vs Selectivity score

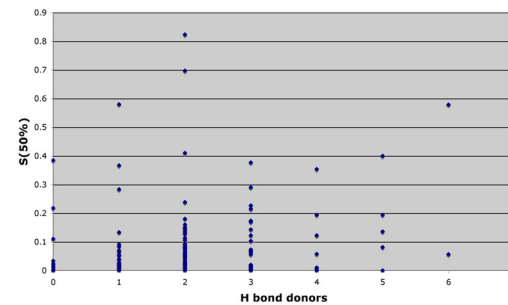

**Supplementary Figure 5.** Validation of novel uni-specific kinase inhibitors. Complete *in vitro* kinase assay dose-response results are shown for the five indicated uni-specific compounds (**a-e**) from **Figure 5** against both the intended targets of each inhibitor and their novel, more potently inhibited target(s). Data for intended kinase target(s) are shown with open symbols and novel target(s) with closed symbols. Data points represent averages of two independent replicates. Error bars denote standard error of the mean. Data exhibiting significant inhibition was fitted with a sigmoidal dose-response curve to derive IC<sub>50</sub> values.

# Supplementary Figure 5

**a**

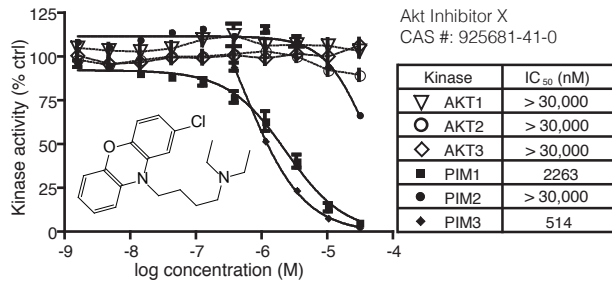

**b**

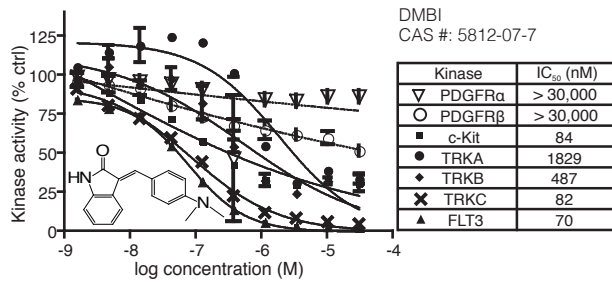

**c**

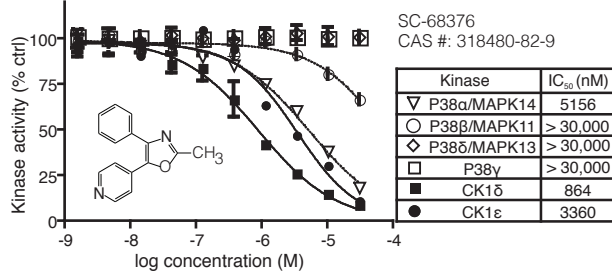

**d**

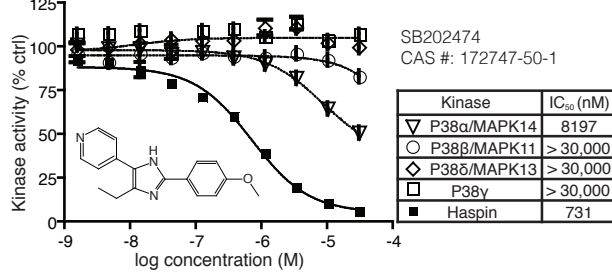

**e**

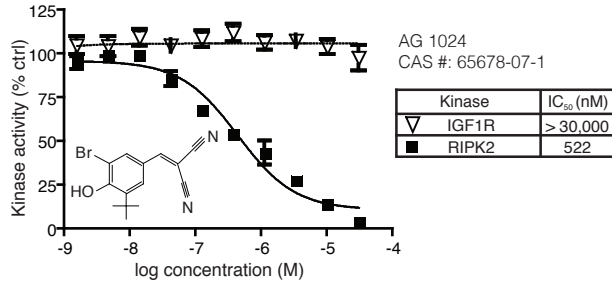

**Supplementary Table 1.** Compounds used in this study.

| Name    | CAS #       | Structure                                                                            | Target family |
|---------|-------------|--------------------------------------------------------------------------------------|---------------|
| AG 1024 | 65678-07-1  | 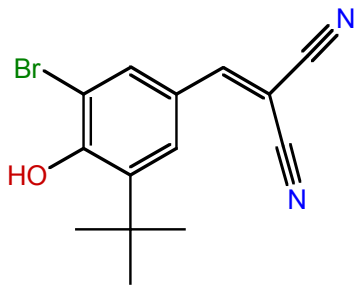   | TK            |
| AG 112  | 144978-82-5 |    | TK            |
| AG 1295 | 71897-07-9  |   | TK            |
| AG 1296 | 146535-11-7 |  | TK            |
| AG 1478 | 175178-82-2 |  | TK            |
| AG 490  | 133550-30-8 |  | TK            |



|                                                       |             |                                                                                      |     |
|-------------------------------------------------------|-------------|--------------------------------------------------------------------------------------|-----|
| AG 9                                                  | 2826-26-8   | 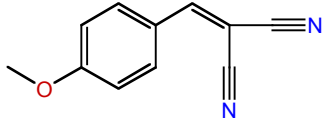   | TK  |
| AGL 2043                                              | 226717-28-8 |    | TK  |
| Akt Inhibitor IV                                      | 681281-88-9 |    | AGC |
| Akt Inhibitor V,<br>Triciribine                       | 35943-35-2  |  | AGC |
| Akt Inhibitor VIII,<br>Isozyme-Selective,<br>Akti-1/2 | 612847-09-3 |  | AGC |

|                                 |             |                                                                                      |      |
|---------------------------------|-------------|--------------------------------------------------------------------------------------|------|
| Akt Inhibitor X                 | 925681-41-0 | 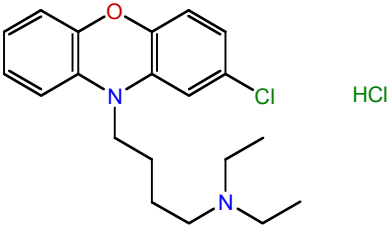   | AGC  |
| Aloisine A, RP107               | 496864-16-5 |    | CMGC |
| Aloisine, RP106                 | 496864-15-4 |   | CMGC |
| Alsterpaullone                  | 237430-03-4 |  | CMGC |
| Alsterpaullone,<br>2-Cyanoethyl | 852527-97-0 |  | CMGC |

Aminopurvalanol A 220792-57-4

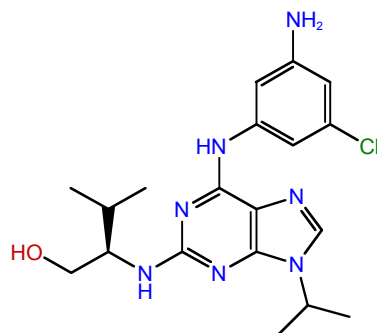

CMGC

AMPK Inhibitor,  
Compound C 866405-64-3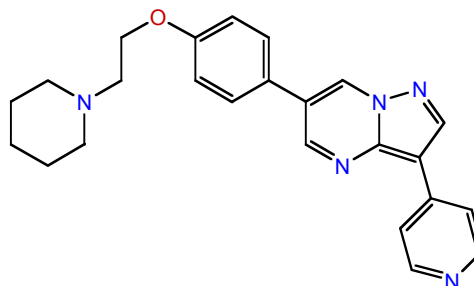

CAMK

ATM Kinase Inhibitor 587871-26-9

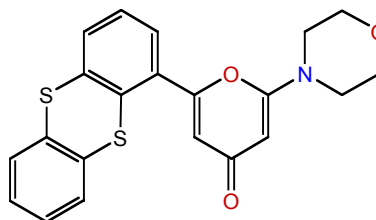

ATYPICAL

ATM/ATR Kinase  
Inhibitor 905973-89-9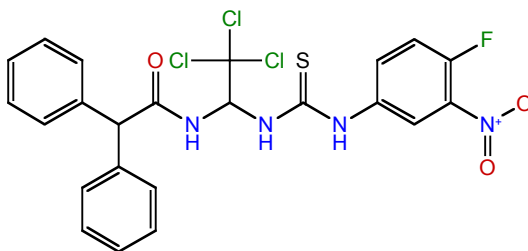

ATYPICAL

Aurora Kinase  
Inhibitor III 879127-16-9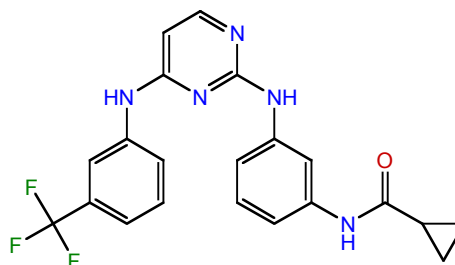

OTHER

Aurora Kinase/  
Cdk Inhibitor

443797-96-4

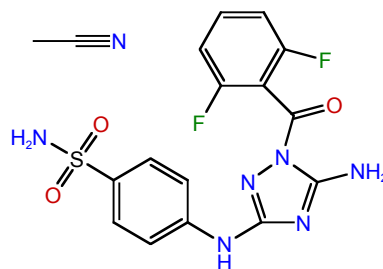OTHER,  
CMGC

BAY 11-7082

19542-67-7

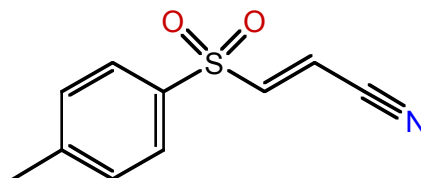

OTHER

Bcr-abl Inhibitor

778270-11-4

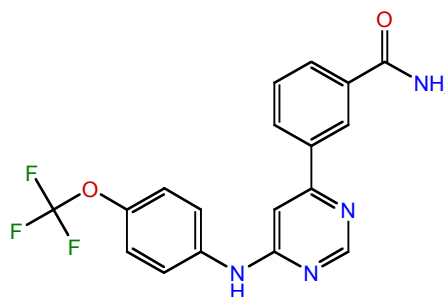

TK

Bisindolylmaleimide I

133052-90-1

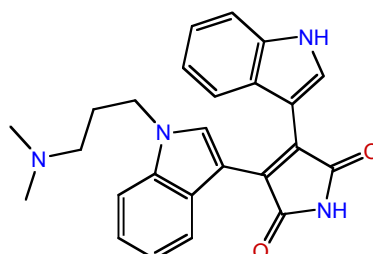

AGC

Bisindolylmaleimide IV

119139-23-0

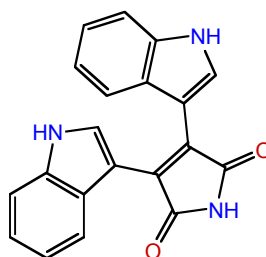

AGC

|                                      |             |                                                                                      |                |
|--------------------------------------|-------------|--------------------------------------------------------------------------------------|----------------|
| Bohemine                             | 189232-42-6 | 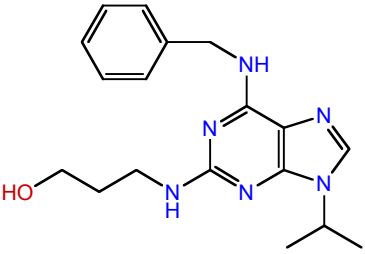   | CMGC           |
| Bosutinib                            | 380843-75-4 |    | TK             |
| BPIQ-I                               | 174709-30-9 |   | TK             |
| Casein Kinase I Inhibitor, D4476     | 301836-43-1 |  | CK1, CMGC, TKL |
| Casein Kinase II Inhibitor III, TBCA | 934358-00-6 |  | CK1            |

|                                   |             |                                                                                      |      |
|-----------------------------------|-------------|--------------------------------------------------------------------------------------|------|
| Cdc2-Like Kinase Inhibitor, TG003 | 300801-52-9 | 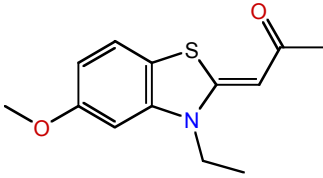   | CMGC |
| Cdk/Crk Inhibitor                 | 784211-09-2 |    | CMGC |
| Cdk1 Inhibitor                    | 220749-41-7 |   | CMGC |
| Cdk1 Inhibitor, CGP74514A         | 190654-01-4 |  | CMGC |
| Cdk1/2 Inhibitor III              | 443798-55-8 |  | CMGC |

Cdk1/5 Inhibitor

40254-90-8

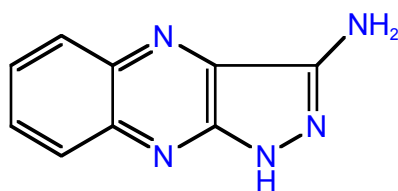

CMGC

Cdk2 Inhibitor III

199986-75-9

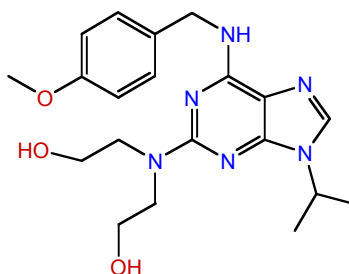

CMGC

Cdk2 Inhibitor IV,  
NU6140

444723-13-1

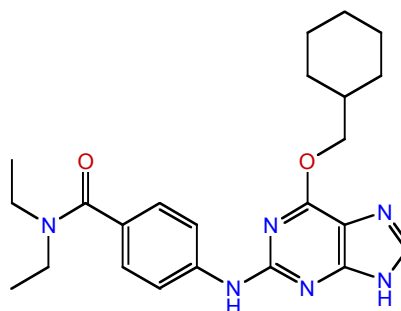

CMGC

Cdk4 Inhibitor

546102-60-7

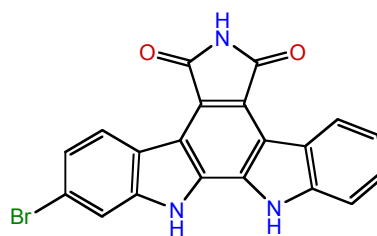

CMGC

Cdk4 Inhibitor II,  
NSC 625987

141992-47-4

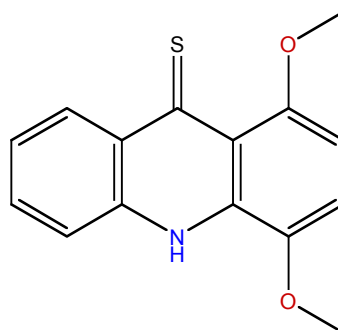

CMGC

|                                         |             |                                                                                      |      |
|-----------------------------------------|-------------|--------------------------------------------------------------------------------------|------|
| Cdk4 Inhibitor III                      | 265312-55-8 | 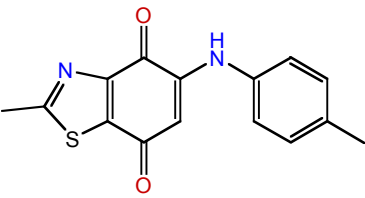   | CMGC |
| cFMS Receptor Tyrosine Kinase Inhibitor | 870483-87-7 |    | TK   |
| Chelerythrine Chloride                  | 3895-92-9   |   | AGC  |
| Chk2 Inhibitor II                       | 516480-79-8 |  | CAMK |
| Compound 52                             | 212779-48-1 |  | CMGC |



|                                    |             |                                                                                      |          |
|------------------------------------|-------------|--------------------------------------------------------------------------------------|----------|
| Compound 56                        | 171745-13-4 | 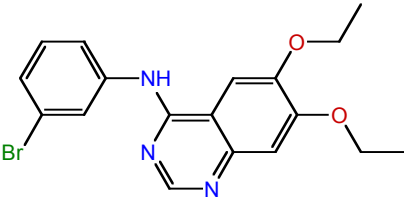   | TK       |
| Dasatinib                          | 302962-49-8 |    | TK       |
| Diacylglycerol Kinase Inhibitor II | 120166-69-0 |   | LIPID    |
| DMBI                               | 5812-07-7   |  | TK       |
| DNA-PK Inhibitor II                | 154447-35-5 |  | ATYPICAL |

DNA-PK Inhibitor III 404009-40-1

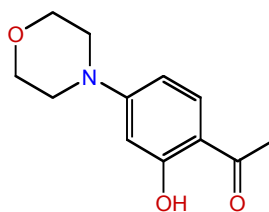

ATYPICAL

DNA-PK Inhibitor V 404009-46-7

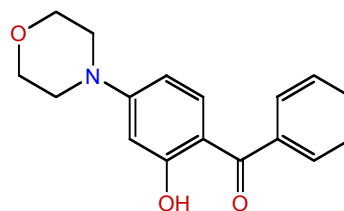

ATYPICAL

Dovitinib 405169-16-6

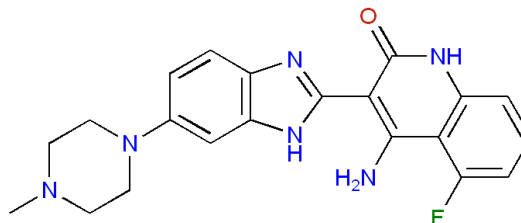

TK

EGFR Inhibitor 879127-07-8

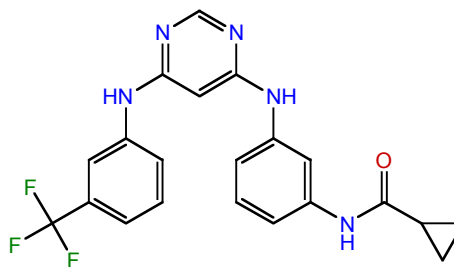

TK

EGFR/ErbB-2 Inhibitor 179248-61-4

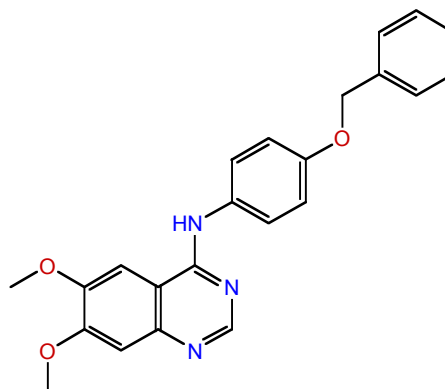

TK

|                                 |             |                                                                                      |      |
|---------------------------------|-------------|--------------------------------------------------------------------------------------|------|
| EGFR/ErbB-2/ErbB-4<br>Inhibitor | 881001-19-0 | 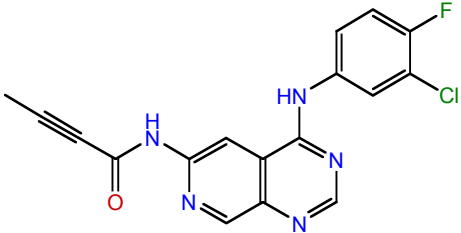   | TK   |
| ERK Inhibitor II,<br>FR180204   | 865362-74-9 |    | CMGC |
| ERK Inhibitor III               | 345616-52-6 |   | CMGC |
| Erlotinib                       | 183319-69-9 |  | TK   |
| Fascaplysin, Synthetic          | 114719-57-2 |  | CMGC |

Flt-3 Inhibitor

301305-73-7

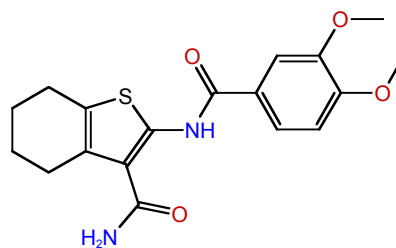

TK

Flt-3 Inhibitor II

896138-40-2

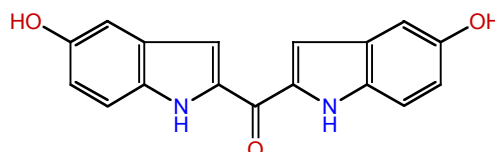

TK

Flt-3 Inhibitor III

852045-46-6

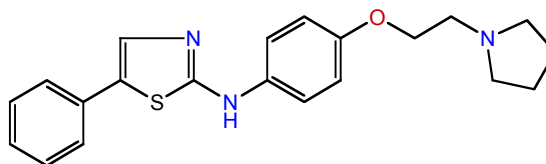

TK

Gefitinib

184475-35-2

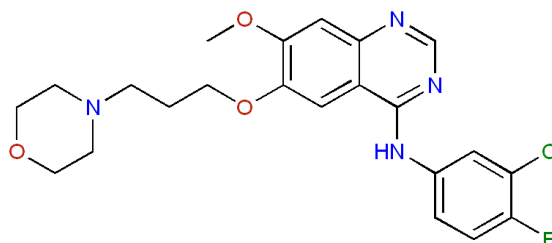

TK

Gö 6976

136194-77-9

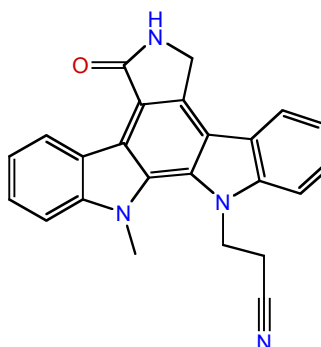

AGC

|                      |             |                                                                                      |                  |
|----------------------|-------------|--------------------------------------------------------------------------------------|------------------|
| Gö 6983              | 133053-19-7 | 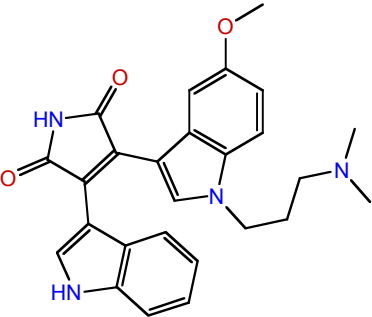   | AGC              |
| GSK-3 Inhibitor IX   | 667463-62-9 |    | CMGC             |
| GSK-3 Inhibitor X    | 740841-15-0 |   | CMGC             |
| GSK-3 Inhibitor XIII | 404828-08-6 |  | CMGC             |
| GSK-3b Inhibitor I   | 327036-89-5 |  | CMGC,<br>AGC, TK |

GSK-3b Inhibitor II 478482-75-6

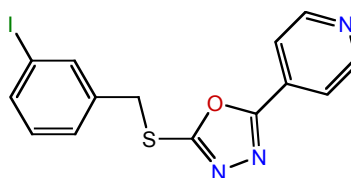

CMGC

GSK-3b Inhibitor VIII 487021-52-3

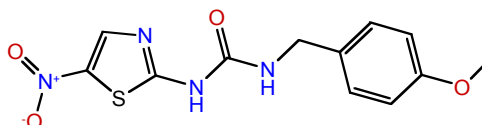

CMGC

GSK-3b Inhibitor XI 626604-39-5

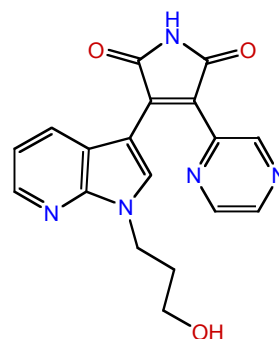

CMGC

GSK3b Inhibitor XII,  
TWS119 601514-19-6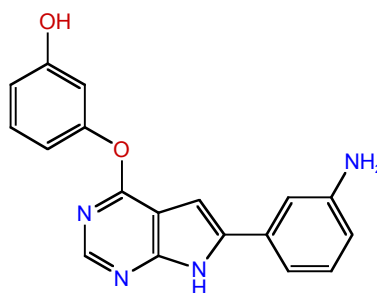

CMGC

GTP-14564 34823-86-4

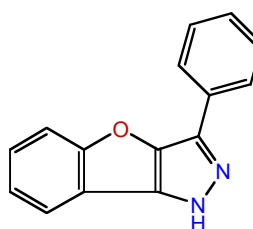

TK

H-89, Dihydrochloride 127243-85-0

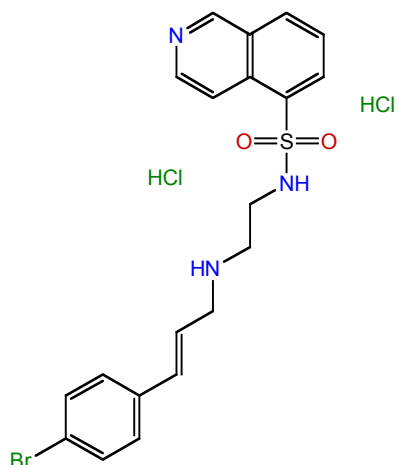AGC, CK1,  
CAMKHA 1077,  
Dihydrochloride  
Fasudil 103745-39-7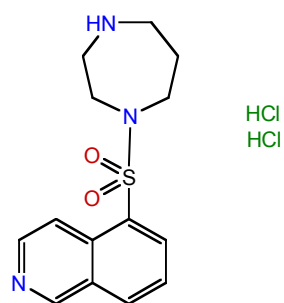

AGC

Herbimycin A,  
Streptomyces sp. 70563-58-5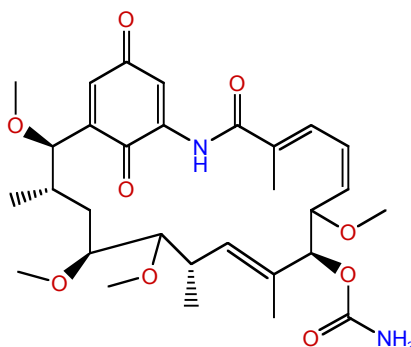

TK

IC261 186611-52-9

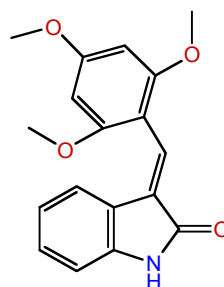

CK1

|                           |             |                                                                                      |          |
|---------------------------|-------------|--------------------------------------------------------------------------------------|----------|
| IGF-1R Inhibitor II       | 196868-63-0 | 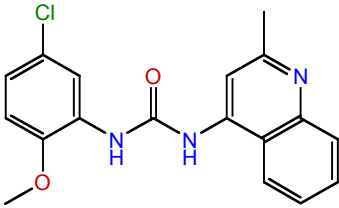   | TK       |
| IKK-2 Inhibitor IV        | 507475-17-4 |    | OTHER    |
| Imatinib                  | 220127-57-1 |    | TK       |
| Indirubin Derivative E804 | 854171-35-0 |  | CMGC, TK |
| Indirubin-3'-monoxime     | 160807-49-8 |  | CMGC     |



IRAK-1/4 Inhibitor 509093-47-4

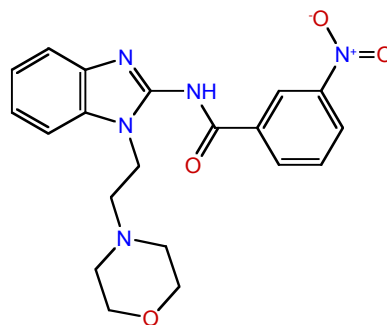

TKL

Isogranulatimide 244148-46-7

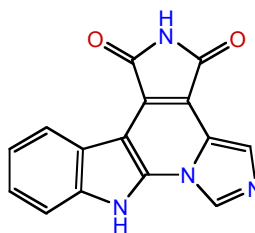CAMK,  
CMGC,  
ATYPICAL

JAK Inhibitor I 457081-03-7

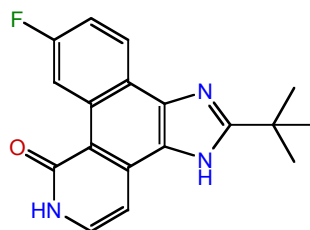

TK

JAK3 Inhibitor II 211555-04-3

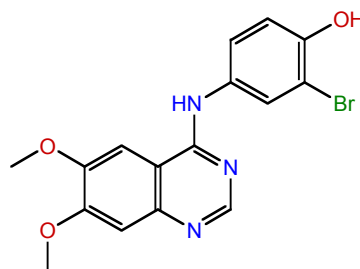

TK

JAK3 Inhibitor IV 58753-54-1

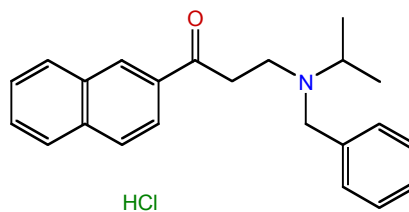

TK

|                    |             |                                                                                                                                                       |      |
|--------------------|-------------|-------------------------------------------------------------------------------------------------------------------------------------------------------|------|
| JAK3 Inhibitor VI  | 856436-16-3 | 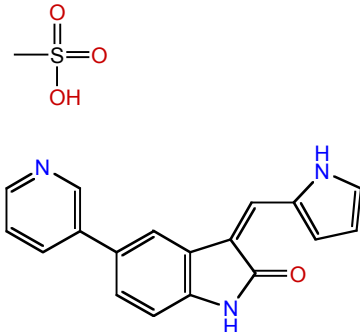<br><chem>COS(=O)(=O)c1ccc2c(c1)c3ccn3c2c4ccn4</chem>               | TK   |
| JNK Inhibitor II   | 129-56-6    | <br><chem>O=C1c2ccncc2-c3ccccc13</chem>                             | CMGC |
| JNK Inhibitor IX   | 312917-14-9 | <br><chem>O=C(NC1=CC=C2C=CC=CC12)C3=C(C#N)SC4CCCCC34</chem>        | CMGC |
| JNK Inhibitor V    | 345987-15-7 | <br><chem>N#CC1=C(C2=CC=CC=C2S1)C3=CC=NC=C3NCCC4=CC=CC=N4</chem>  | CMGC |
| JNK Inhibitor VIII | 894804-07-0 | <br><chem>CCOC1=CC=C(OC)C(OC)=C1CCC(=O)Nc2cc(C#N)c(N)c2OCC</chem> | CMGC |

JNK Inhibitor,  
Negative Control

54642-23-8

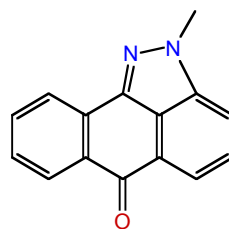

INACTIVE

K-252a,  
Nocardiosis sp.

97161-97-2

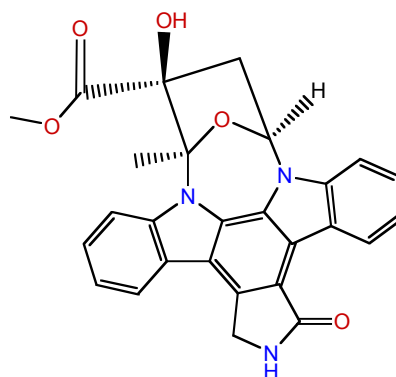

AGC

Kenpaullone

142273-20-9

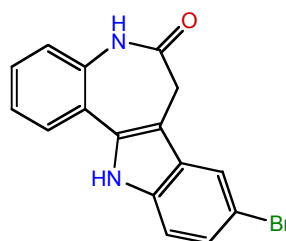CMGC, CK1,  
TK

KN-62

127191-97-3

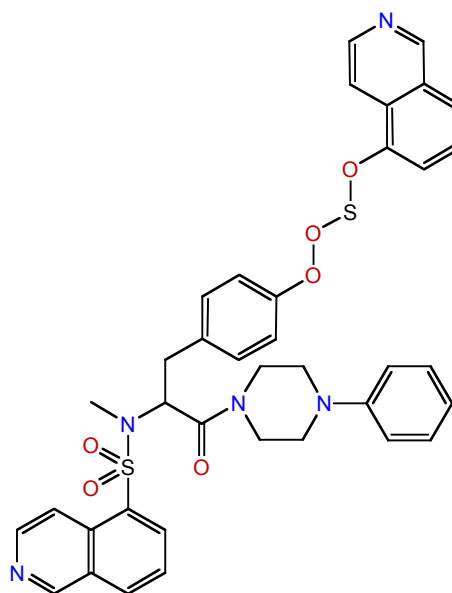

CAMKII

|                             |             |                                                                                                                                                                                                                                                                                                                                                                                                                                                                                                                                                      |
|-----------------------------|-------------|------------------------------------------------------------------------------------------------------------------------------------------------------------------------------------------------------------------------------------------------------------------------------------------------------------------------------------------------------------------------------------------------------------------------------------------------------------------------------------------------------------------------------------------------------|
| KN-93                       | 139298-40-1 | 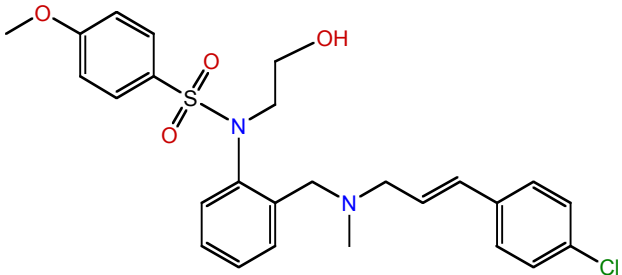<br>Chemical structure of KN-93, a protein kinase inhibitor. It features a central benzene ring with a methoxy group at the para position and a propyl chain at the other para position. The propyl chain is substituted with a hydroxyl group at the end and a secondary amine at the middle carbon. This secondary amine is further substituted with a methyl group and a propyl chain that ends in a trans-alkene, which is connected to a 4-chlorophenyl ring. |
| Lapatinib                   | 231277-92-2 | <br>Chemical structure of Lapatinib, a tyrosine kinase inhibitor. It consists of a central benzimidazole ring system. One of the benzimidazole nitrogens is substituted with a propyl chain ending in a methylsulfonamide group. The other benzimidazole nitrogen is substituted with a propyl chain that is further substituted with a chlorine atom and a methoxy group. The methoxy group is connected to a 4-fluorophenyl ring.                                |
| Lck Inhibitor               | 213743-31-8 | <br>Chemical structure of an Lck inhibitor. It features a central benzimidazole ring system. One of the benzimidazole nitrogens is substituted with a propyl chain ending in a primary amine group. The other benzimidazole nitrogen is substituted with a propyl chain that is further substituted with a cyclopentyl ring and a propyl chain ending in a phenoxy group.                                                                                         |
| LY 294002                   | 154447-36-6 | <br>Chemical structure of LY 294002, a phosphoinositide 3-kinase inhibitor. It consists of a central benzimidazole ring system. One of the benzimidazole nitrogens is substituted with a propyl chain ending in a carbonyl group. The other benzimidazole nitrogen is substituted with a propyl chain that is further substituted with a benzyl group and a morpholine ring.                                                                                     |
| LY 303511- Negative control | 154447-38-8 | <br>Chemical structure of LY 303511- Negative control, a phosphoinositide 3-kinase inhibitor. It consists of a central benzimidazole ring system. One of the benzimidazole nitrogens is substituted with a propyl chain ending in a carbonyl group. The other benzimidazole nitrogen is substituted with a propyl chain that is further substituted with a benzyl group and a piperidine ring.                                                                   |

|                      |             |                                                                                      |     |
|----------------------|-------------|--------------------------------------------------------------------------------------|-----|
| Masitinib            | 790299-79-5 | 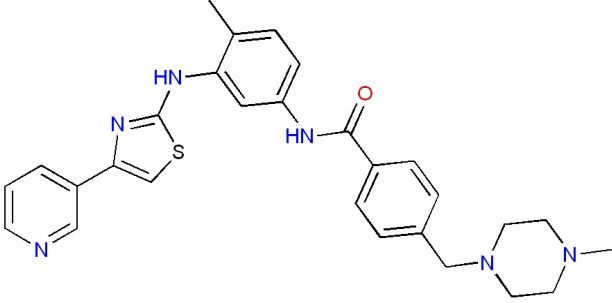   | TK  |
| MEK Inhibitor I      | 297744-42-4 |    | STE |
| MEK Inhibitor II     | 623163-52-0 |   | STE |
| MEK1/2 Inhibitor     | 305350-87-2 |  | STE |
| Met Kinase Inhibitor | 658084-23-2 |  | TK  |



|                              |             |                                                                                                                                                              |      |
|------------------------------|-------------|--------------------------------------------------------------------------------------------------------------------------------------------------------------|------|
| Nilotinib                    | 641571-10-0 | 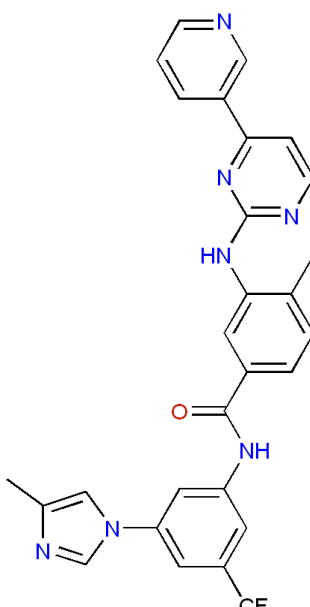 <chem>Cc1ccc(cc1NC(=O)Nc2ccc(C)c2)c3nc4ccc(N)cc4n3</chem>                 | TK   |
| p38 MAP Kinase Inhibitor     | 219138-24-6 |  <chem>C1=CC=C(C=C1)N2C(=O)C(=C3C=CC(=C3)F)C4=CC=CC=C4N2</chem>           | CMGC |
| p38 MAP Kinase Inhibitor III | 581098-48-8 |  <chem>CSC1=NC(=C2C=C(C=C2)F)C(=C3C=CC(=C3)N)N1C(=O)C(C)Nc4ccccc4</chem> | CMGC |
| Pazopanib                    | 444731-52-6 |  <chem>Cc1nc2ccc(NC(=O)Nc3ccc(C)cc3)cc2n1</chem>                         | TK   |

|                                                  |             |                                                                                      |      |
|--------------------------------------------------|-------------|--------------------------------------------------------------------------------------|------|
| PD 158780                                        | 171179-06-9 | 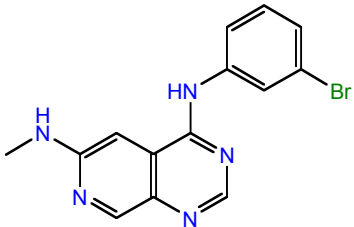   | TK   |
| PD 169316                                        | 152121-53-4 |    | CMGC |
| PD 174265                                        | 216163-53-0 |   | TK   |
| PD 98059                                         | 167869-21-8 |  | STE  |
| PDGF Receptor<br>Tyrosine Kinase<br>Inhibitor II | 249762-74-1 |  | TK   |



|                                             |                                   |                                                                                                                                                             |                         |
|---------------------------------------------|-----------------------------------|-------------------------------------------------------------------------------------------------------------------------------------------------------------|-------------------------|
| PDGF Receptor Tyrosine Kinase Inhibitor III | 205254-94-0                       | 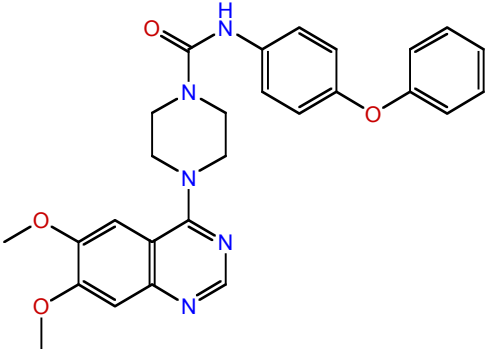 <chem>COC1=CC=C2C(=C1)N=CN=C2N3CCN(CC3)C(=O)Nc4ccc(Oc5ccccc5)cc4</chem>  | TK                      |
| PDGF Receptor Tyrosine Kinase Inhibitor IV  | 627518-40-5                       |  <chem>COC1=CC=C2C(=C1)C=C(C2)C(=N)Nc3ccc(F)cc3</chem>                    | TK                      |
| PDGF RTK Inhibitor                          | 347155-76-4                       |  <chem>COC1=CC=C2C(=C1)N=CN=C2Oc3ccc(O)cc3NC(=S)NC(=O)c4cc(O)ccc4</chem> | TK                      |
| PDK1/Akt/Fit Dual Pathway Inhibitor         | 331253-86-2<br>and<br>329710-24-9 |  <chem>O=C1C=Cc2ccccc2N1N3N=NN3</chem>                                  | AGC,<br>ATYPICAL,<br>TK |
| PI 3-Kg Inhibitor                           | 648450-29-7                       |  <chem>O=C1NC(=O)S1C=Cc2ccc3ncnc3c2</chem>                              | LIPID                   |

PI 3-Kg Inhibitor II 648449-76-7

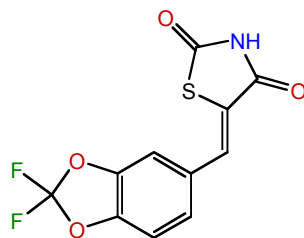

LIPID

PI-103 371935-74-9

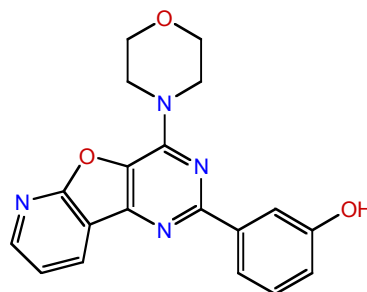

LIPID

PKCb Inhibitor 257879-35-9

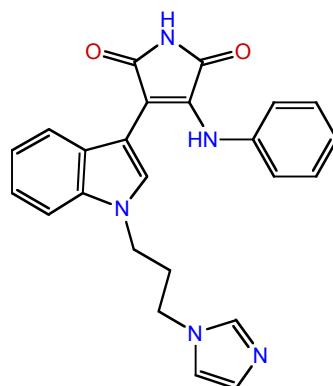

AGC

PKCbII/EGFR Inhibitor 145915-60-2

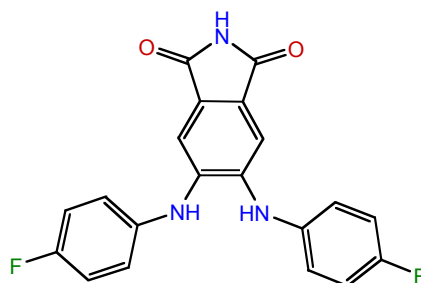

TK, AGC

PKR Inhibitor 608512-97-6

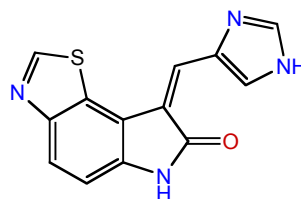

OTHER

PKR Inhibitor,  
Negative Control

852547-30-9

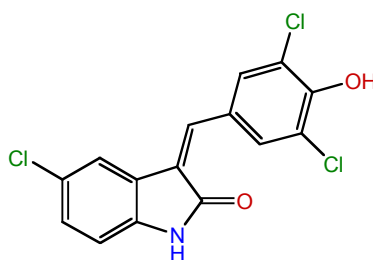

INACTIVE

PP1 Analog II,  
1NM-PP1

221244-14-0

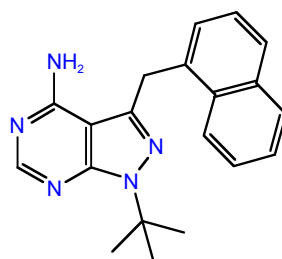

TK

PP3

5334-30-5

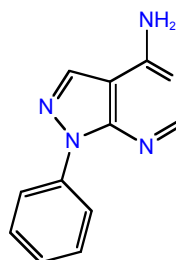

TK

Purvalanol A

212844-53-6

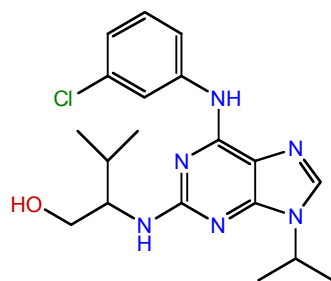

CMGC

Rapamycin

53123-88-9

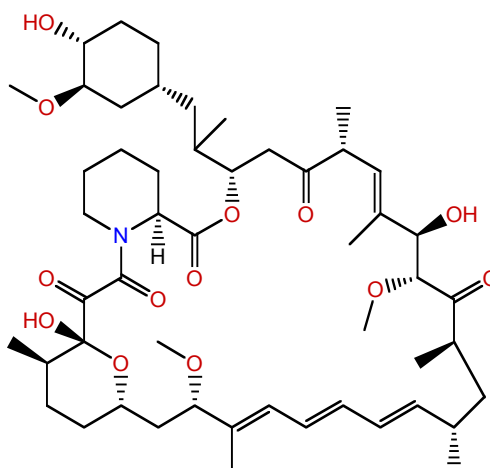

AGC

|                                      |             |                                                                                                                       |     |
|--------------------------------------|-------------|-----------------------------------------------------------------------------------------------------------------------|-----|
| Rho Kinase Inhibitor III,<br>Rockout | 7272-84-6   | 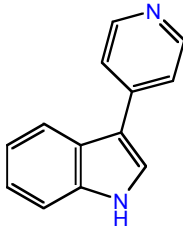                                    | AGC |
| Rho Kinase Inhibitor IV              | 913844-45-8 |                                     | AGC |
| Ro-32-0432                           | 151342-35-7 | <br>HCl                            | AGC |
| ROCK Inhibitor,<br>Y-27632           | 146986-50-7 | <br>HCl<br>HCl<br>OH <sub>2</sub> | AGC |

|                                                             |             |                                                                                      |          |
|-------------------------------------------------------------|-------------|--------------------------------------------------------------------------------------|----------|
| Roscovitine                                                 | 186692-46-6 | 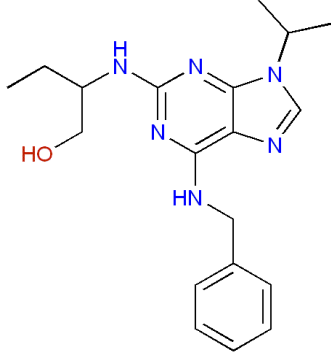   | CMGC     |
| SB 202190                                                   | 152121-30-7 |    | CMGC     |
| SB 202474, Negative control for p38 MAPK inhibition studies | 172747-50-1 |   | INACTIVE |
| SB 203580                                                   | 152121-47-6 |  | CMGC     |
| SB 218078                                                   | 135897-06-2 |  | CAMK     |

|                              |             |                                                                                      |       |
|------------------------------|-------------|--------------------------------------------------------------------------------------|-------|
| SB220025                     | 165806-53-1 | 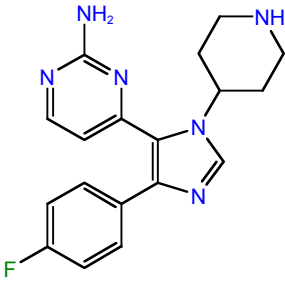   | CMGC  |
| SC-68376                     | 318480-82-9 |    | CMGC  |
| SKF-86002                    | 72873-74-6  |   | CMGC  |
| Sorafenib                    | 284461-73-0 |  | TK    |
| Sphingosine Kinase Inhibitor | 312636-16-1 |  | LIPID |

|                                 |             |                                                                                      |                  |
|---------------------------------|-------------|--------------------------------------------------------------------------------------|------------------|
| Src Kinase Inhibitor I          | 179248-59-0 | 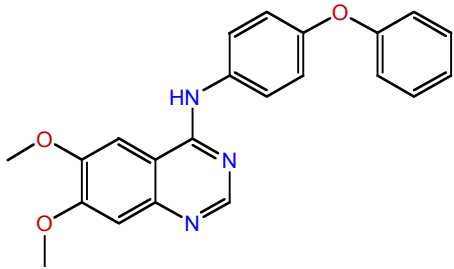   | TK               |
| Staurosporine, N-benzoyl-       | 120685-11-2 |   | AGC,<br>CMGC, TK |
| Staurosporine, Streptomyces sp. | 62996-74-1  |  | AGC, CAMK,<br>TK |
| STO-609                         | 52029-86-4  |  | CAMK             |

|               |             |                                                                                      |      |
|---------------|-------------|--------------------------------------------------------------------------------------|------|
| SU11652       | 326914-10-7 | 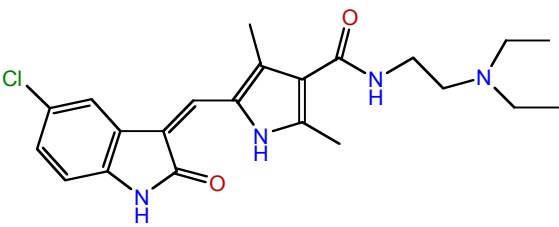   | TK   |
| SU6656        | 330161-87-0 |    | TK   |
| SU9516        | 666837-93-0 |    | CMGC |
| Sunitinib     | 557795-19-4 |  | TK   |
| Syk Inhibitor | 622387-85-3 |  | TK   |



|                           |             |                                                                                      |                                              |     |
|---------------------------|-------------|--------------------------------------------------------------------------------------|----------------------------------------------|-----|
| Syk Inhibitor II          | 227449-73-2 | 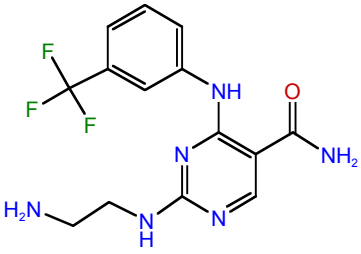   | $\text{OH}_2$<br>$\text{OH}_2$<br>HCl<br>HCl | TK  |
| Syk Inhibitor III         | 1485-00-3   |    |                                              | TK  |
| Tandutinib                | 387867-13-2 |   |                                              | TK  |
| TGF-b RI Inhibitor III    | 356559-13-2 |  | HCl                                          | TKL |
| TGF-b RI Kinase Inhibitor | 396129-53-6 |  |                                              | TKL |

|                       |             |                                                                                                                                                           |       |
|-----------------------|-------------|-----------------------------------------------------------------------------------------------------------------------------------------------------------|-------|
| Tofacitinib           | 477600-75-2 | 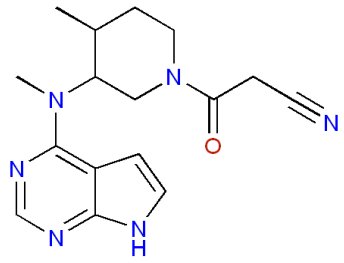 <chem>CN1CCN(C1)C2=CN3C=CC=C3N2C(=O)CC#N</chem>                        | TK    |
| Tozasertib            | 639089-54-6 |  <chem>CN1CCN(C1)C2=CN3C=CC=C3N2S4=CC=C(C=C4)NC(=O)C5CC5</chem>         | OTHER |
| Tpl2 Kinase Inhibitor | 871307-18-5 |  <chem>C#Nc1nc2nc3c(nc12)ncn3C4=CC=C(C=C4)N5C=CC=C5F</chem>            | CMGC  |
| Vandetanib            | 443913-73-3 |  <chem>COC1=CC=C(C=C1OC2=CC=NC=C2NC3=CC=C(C=C3)F)C4=CC=CC=C4Br</chem> | TK    |

|                                      |             |                                                                                      |    |
|--------------------------------------|-------------|--------------------------------------------------------------------------------------|----|
| Vatalanib                            | 212141-51-0 | 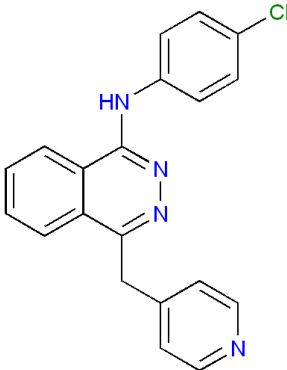   | TK |
| VEGF Receptor 2 Kinase Inhibitor I   | 15966-93-5  |    | TK |
| VEGF Receptor 2 Kinase Inhibitor II  | 288144-20-7 |   | TK |
| VEGF Receptor 2 Kinase Inhibitor III | 204005-46-9 |  | TK |
| VEGF Receptor 2 Kinase Inhibitor IV  | 216661-57-3 |  | TK |

VEGF Receptor  
Tyrosine Kinase  
Inhibitor II

269390-69-4

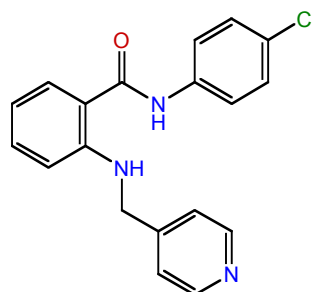

TK

VEGF Receptor  
Tyrosine Kinase  
Inhibitor III, KRN633

286370-15-8

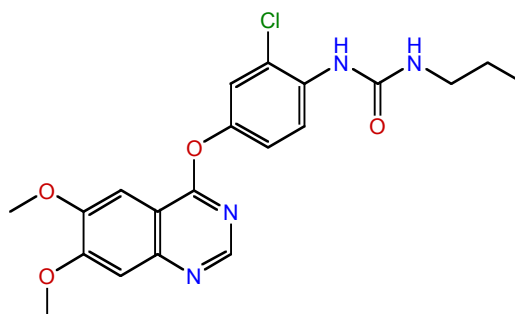

TK

VX-702

745833-23-2

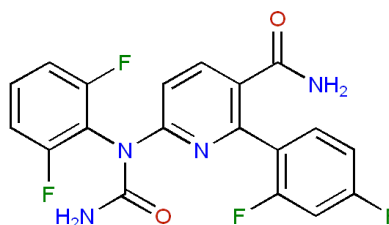

CMGC

Wortmannin

19545-26-7

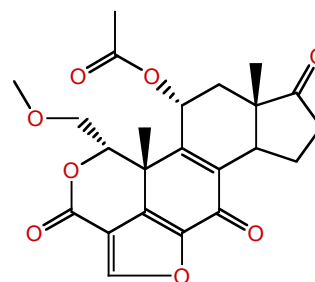

ATYPICAL

**Supplementary Table 2.** Kinase constructs and substrates used in this study.

| RBC Enzyme Name | HUGO symbol | Substrate   | Genbank Accession # | Protein Accession # | Clone                 | Mutation    | Expression                                          | Tag                 |
|-----------------|-------------|-------------|---------------------|---------------------|-----------------------|-------------|-----------------------------------------------------|---------------------|
| ABL1            | ABL1        | Abltide     | NP_005148.2         | P00519              | full-length           | -           | baculovirus in Sf21 insect cells                    | C-terminal His      |
| ABL2/ARG        | ABL2        | Abltide     | NP_009298           | P42684              | full-length           | -           | baculovirus in Sf21 insect cells                    | C-terminal His      |
| ACK1            | TNK2        | Abltide     | NP_005772.3         | Q07912              | aa 110-476            | -           | baculovirus in Sf21 insect cells                    | N-terminal GST      |
| AKT1            | AKT1        | Crosstide   | NP_005154           | P31749              | full-length           |             | baculovirus in Sf21 insect cells                    | N-terminal His      |
| AKT2            | AKT2        | Crosstide   | NP_001617           | P31751              | full-length           |             | baculovirus in Sf21 insect cells, activated by PDK1 | N-terminal His      |
| AKT3            | AKT3        | Crosstide   | NP_005456           | Q9Y243              | full-length           |             | baculovirus in Sf21 insect cells                    | N-terminal His      |
| ALK             | ALK         | pEY         | NP_004295.2         | Q9UM73              | cytoplasmic           | -           | Insect                                              | N-terminal GST      |
| ALK1/ACVRL1     | ACVRL1      | Casein      | NP_000011.2         | P37023              | cytoplasmic aa139-503 | -           | Insect                                              | N-terminal GST      |
| ALK2/ACVR1      | ACVR1       | Casein      | NP_001096.1         | Q04771              | cytoplasmic aa145-509 | -           | Insect                                              | N-terminal GST      |
| ALK4/ACVR1B     | ACVR1B      | Casein      | NP_004293           | P36896              | aa 150-505            | -           | Baculovirus infected insect cells                   | N-terminal GST      |
| ALK5/TGFBR1     | TGFBR1      | Casein      | NM_004612           | P36897              | aa200-503             | -           | Sf9 cells                                           | GST-HIS fusion      |
| ARAF            | ARAF        | MEK1 (K97R) | NM_001654           | P10398              | aa 282-end            | YY301-302DD | Baculovirus infected Sf9 cells                      | N-terminal GST-tag  |
| ARK5/NUAK1      | NUAK1       | CHKtide     | NP_055655           | O60285              | full-length           | -           | Insect                                              | N-terminal His      |
| ASK1/MAP3K5     | MAP3K5      | MBP         | NP_005914           | O99683              | full-length           | -           | Insect                                              | N-terminal GST      |
| Aurora A        | AURKA       | Kemptide    | NP_940839           | O14965              | full length           | -           | baculovirus in Sf21 insect cells                    | N-terminal His6-tag |
| Aurora B        | AURKB       | Kemptide    | NP_004208.2         | Q96GD4              | full-length           | -           | Insect                                              | N-terminal His      |
| Aurora C        | AURKC       | Kemptide    | AAH75064, NP_003151 | Q9UQB9              | full-length           | -           | Insect                                              | N-terminal His      |

| RBC Enzyme Name | HUGO symbol | Substrate              | Genbank Accession # | Protein Accession # | Clone                 | Mutation | Expression                       | Tag                    |
|-----------------|-------------|------------------------|---------------------|---------------------|-----------------------|----------|----------------------------------|------------------------|
| AXL             | AXL         | Abltide + Mn           | NP_068713           | P30530              | aa 473-894            | -        | Baculovirus infected Sf9 cells   | C-terminal His         |
| BLK             | BLK         | pEY                    | NP_001706           | P51451              | full-length           | -        | Insect                           | N-terminal His         |
| BMX/ETK         | BMX         | pEY                    | NP_001712           | P51813              | full length           | -        | baculovirus in Sf21 insect cells | C-terminal His         |
| BRAF            | BRAF        | MEK1 (K97R)            | NP_004324.2         | P15056              | full-length           | -        | Insect                           | N-terminal GST         |
| BRK             | PTK6        | pEY + Mn               | NP_005966           | Q13882              | full-length           | -        | Insect                           | C-terminal His         |
| BRSK1           | BRSK1       | CHKtide                | NP_115806           | Q8TDC3              | full-length           | -        | Insect                           | N-terminal GST-tag     |
| BRSK2           | BRSK2       | ZIptide                | GenBank NM_003957   | Q8IWQ3              | full-length           | -        | baculovirus in Sf21 insect cells | N-terminal His6-tag    |
| BTK             | BTK         | pEY                    | NP_000052           | Q06187              | full-length           | -        | Insect                           | N-terminal His6-tagged |
| CAMK1a          | CAMK1       | Autocamtide 2 + Ca-CaM | NP_003647.1         | Q14012              | full length           | -        | baculovirus insect cell          | N-terminal His-tag     |
| CAMK1b          | PNCK        | Autocamtide 2 + Ca-CaM | GenBank NM_012040   | Q6P2M8              | full length           | -        | baculovirus insect cell          | N-terminal GST-tag     |
| CAMK1d          | CAMK1D      | Autocamtide 2 + Ca-CaM | NP_705718.1         | Q8IU85              | full length           | -        | baculovirus insect cell          | N-terminal His-tag     |
| CAMK1g          | CAMK1G      | Autocamtide 2 + Ca-CaM | GenBank NM_020439   | Q96NX5              | C-terminal truncation | -        | baculovirus insect cell          | N-terminal GST-tag     |
| CAMK2a          | CAMK2A      | Autocamtide 2 + Ca-CaM | NP_741960           | Q9UQM7              | full length           | -        | baculovirus insect cell          | C-terminal His-tag     |
| CAMK2b          | CAMK2B      | Autocamtide 2 + Ca-CaM | NP_742078.1         | Q13554              | full length           | -        | baculovirus insect cell          | N-terminal His6-tag    |
| CAMK2d          | CAMK2D      | ZIptide + Ca-CaM*      | NP_742113           | Q13557              | full length           | -        | baculovirus insect cell          | C-terminal His6-tag    |
| CAMK2g          | CAMK2G      | ZIptide + Ca-CaM*      | GenBank NM_172169   | Q13555              | C-terminal truncation | -        | baculovirus in Sf9 insect cells  | N-terminal GST-tag     |
| CAMK4           | CAMK4       | ZIptide + Ca-CaM*      | NP_001735           | Q9UQM7              | full length           | -        | E. coli                          | N-terminal GST-tag     |
| CAMKK1          | CAMKK1      | MBP + Ca-CaM           | GenBank NM_032294   | Q8N5S9              | full-length           | -        | baculovirus in Sf9 insect cells  | N-terminal GST         |

| RBC Enzyme Name | HUGO symbol | Substrate    | Genbank Accession #                     | Protein Accession #                      | Clone                     | Mutation | Expression                        | Tag                                       |
|-----------------|-------------|--------------|-----------------------------------------|------------------------------------------|---------------------------|----------|-----------------------------------|-------------------------------------------|
| CAMKK2          | CAMKK2      | MBP + Ca-CaM | NP_757380.1                             | Q96RR4                                   | full-length               | -        | Baculovirus infected insect cells | N-terminal GST                            |
| CDK1/cyclin A   | CDK1/CCNA2  | Histone H1   | NM_001786/<br>NM_001237                 | CDK1:<br>P06493;<br>cyclin A:<br>P20248  | full length / full length | -        | baculovirus in Sf9 insect cells   | N-terminal GST-tag / N-terminal GST-tag   |
| CDK1/cyclin B   | CDK1/CCNB1  | Histone H1   | NP_001777/B<br>P_114172                 | CDK1:<br>P06493;<br>cyclin B:<br>P14635  | full length / full length | -        | baculovirus insect cell           | C-terminal His6-tag / N-terminal His6-tag |
| CDK2/cyclin A   | CDK2/CCNA2  | Histone H1   | NP_001789,<br>NP_001228                 | CDK2:<br>P24941;<br>cyclin A:<br>P20248  | full-length               | -        | Insect                            | N-terminal His6-tag / N-terminal His6-tag |
| CDK2/cyclin E   | CDK2/CCNE1  | Histone H1   | EMBL<br>M68520,<br>GenBank<br>NM_001238 | CDK2:<br>P24941;<br>cyclin E:<br>P24864  | full length / full length | -        | baculovirus in Sf21 insect cells  | C-terminal His6-tag / N-terminal GST-tag  |
| CDK3/cyclin E   | CDK3/CCNE1  | Histone H1   | NM_001258,<br>NM_001238                 | CDK3:<br>Q00526;<br>cyclin E:<br>P24864  | full length / full length | -        | baculovirus in Sf9 insect cells   | N-terminal GST-tag                        |
| CDK4/cyclin D1  | CDK4/CCND1  | RB-CTF       | NP_000066,<br>NP_444284                 | CDK4:<br>P11802;<br>Cyclin D1:<br>P24385 | full length               | -        | baculovirus insect cell           | N-terminal GST-tag                        |
| CDK4/cyclin D3  | CDK4/CCND3  | RB-CTF       | NM_000075,<br>NM_001760                 | CDK4:<br>P11802;<br>Cyclin D3:<br>P30281 | full length               | -        | baculovirus in Sf9 insect cells   | N-terminal GST-tag                        |
| CDK5/p25        | CDK5/CDK5R1 | Histone H1   | NP_004926.1,<br>NP_003876               | CDK5:<br>Q00535; p25:<br>Q15078          | full length / full length | -        | baculovirus insect cell           | N-terminal His6-tag / N-terminal GST-tag  |



| RBC Enzyme Name | HUGO symbol     | Substrate  | Genbank Accession #               | Protein Accession #                           | Clone                     | Mutation | Expression                        | Tag                                       |
|-----------------|-----------------|------------|-----------------------------------|-----------------------------------------------|---------------------------|----------|-----------------------------------|-------------------------------------------|
| CDK5/p35        | CDK5/CDK5R1     | Histone H1 | NP_004926.1, NP_003876            | CDK5: Q00535; p35: Q15078                     | full length / full length | -        | baculovirus insect cell           | N-terminal His6-tag / N-terminal His6-tag |
| CDK6/cyclin D1  | CDK6/CCND1      | RB-CTF     | NP_001250, NP_444284              | CDK6: Q00534; Cyclin D1: P24385               | full-length               | -        | Baculovirus infected insect cells | N-terminal GST                            |
| CDK6/cyclin D3  | CDK6/CCND3      | RB-CTF     | X66365, M90814                    | CDK6: Q00534; Cyclin D3: P30281               | full length / full length | -        | baculovirus in Sf9 insect cells   | N-terminal His6-tag / N-terminal GST-tag  |
| CDK7/cyclin H   | CDK7/CCNH/MNAT1 | Histone H1 | NP_001790, NP_001230, NP_002422.1 | CDK7: P50613; Cyclin H: P51946; MNAT1: Q6ICQ7 | full-length               | -        | Insect                            | N-terminal His                            |
| CDK9/cyclin K   | CDK9/CCNK       | PDKtide    | NP_001252, NP_003849              | CDK9: P50750; Cyclin K: O75909                | full length / full length | -        | Insect                            | N-terminal His6-tag / N-terminal His6-tag |
| CDK9/cyclin T1  | CDK9/CCNT1      | PDKtide    | NP_001252, NP_001231              | CDK9: P50750; Cyclin T1: O60563               | full-length               | -        | Insect                            | N-terminal His                            |
| CHK1            | CHEK1           | CHKtide    | GenBank NM_001274                 | O14757                                        | full length               | -        | baculovirus in Sf9 insect cells   | N-terminal His                            |
| CHK2            | CHEK2           | CHKtide    | NP_009125                         | O96017                                        | full-length               | -        | baculovirus in Sf21 insect cells  | C-terminal His                            |
| CK1a1           | CSNK1A1         | CK1tide    | NP_001883.4                       | P48729                                        | full length               | -        | baculovirus insect cell           | GST-tag                                   |
| CK1d            | CSNK1D          | CK1tide    | NP_620693                         | P48730                                        | full length               | -        | baculovirus insect cell           | N-terminal GST-tag                        |
| CK1epsilon      | CSNK1E          | CK1tide    | NP_001885                         | P49674                                        | full length               | -        | baculovirus insect cell           | C-terminal His-tag                        |
| CK1g1           | CSNK1G1         | CK1tide    | NP_071331                         | Q9HCP0                                        | full-length               | -        | Insect                            | N-terminal GST                            |

| RBC Enzyme Name         | HUGO symbol | Substrate              | Genbank Accession #         | Protein Accession # | Clone                      | Mutation | Expression                        | Tag                |
|-------------------------|-------------|------------------------|-----------------------------|---------------------|----------------------------|----------|-----------------------------------|--------------------|
| CK1g2                   | CSNK1G2     | CK1tide                | NP_001310                   | P78368              | full length                | -        | baculovirus insect cell           | C-terminal His-tag |
| CK1g3                   | CSNK1G3     | CK1tide                | NP_004375.1,<br>NP_004375.2 | Q9Y6M4              | full-length                | -        | Insect                            | N-terminal GST     |
| CK2a                    | CSNK2A1     | CK2 sub                | NP_001886                   | P68400              | full length                | -        | baculovirus insect cell           | C-terminal GST-tag |
| CK2a2                   | CSNK2A2     | CK2 sub                | NP_001887                   | P19784              | full length                | -        | baculovirus insect cell           | N-terminal GST-tag |
| c-Kit                   | KIT         | pEY + Mn               | NP_000213                   | P10721              | aa 544-976                 | -        | Insect                            | His6-tag           |
| CLK1                    | CLK1        | MBP                    | NP_004062                   | P49759              | full catalytic domain      | -        | E. coli                           | N-terminal GST     |
| CLK2                    | CLK2        | MBP                    | NP_003984                   | P49760              | catalytic domain aa137-498 | -        | baculovirus insect cell           | N-terminal GST     |
| CLK3                    | CLK3        | MBP                    | NP_003983                   | P49761              | full-length                | -        | Insect                            | N-terminal GST     |
| CLK4                    | CLK4        | MBP                    | NP_065717                   | Q9HAZ1              | full-length                | -        | Insect                            | N-terminal GST     |
| c-MER                   | MERTK       | pEY                    | NP_006334.2                 | Q12866              | aa 578-872                 | -        | baculovirus insect cell           | N-terminal GST     |
| c-MET                   | MET         | MBP                    | NP_000236.2                 | P10721              | aa 956-1390                | -        | baculovirus insect cell           | N-terminal His     |
| COT1/MAP3K <sub>8</sub> | MAP3K8      | MEK1 (K97R)            | NP_005195                   | P41279              | aa 30-397                  | -        | Baculovirus infected insect cells | N-terminal GST     |
| CSK                     | CSK         | pEY                    | NP_004374                   | P41240              | full-length                | -        | E. coli                           | C-terminal His     |
| c-Src                   | SRC         | pEY                    | NP_005408                   | P12931              | full-length                | -        | Insect                            | C-terminal His     |
| CTK/MATK                | MATK        | pEY                    | NP_647611                   | P42679              | full-length                | -        | Insect                            | C-terminal His     |
| DAPK1                   | DAPK1       | ZIPtide                | NP_004929                   | P53355              | full catalytic             | -        | Insect                            | N-terminal GST     |
| DAPK2                   | DAPK2       | ZIPtide + Ca-CaM       | NP_055141                   | Q9UIK4              | full catalytic             | -        | Insect                            | N-terminal GST     |
| DCAMKL2                 | DCLK2       | Autocamtide 2 + Ca-CaM | NP_689832                   | Q8N568              | full-length                | -        | Baculovirus infected insect cells | N-terminal GST     |
| DDR2                    | DDR2        | AXLtide + Mn           | NP_006173.2                 | Q16832              | aa 424-855                 | -        | baculovirus in insect cells       | N-terminal GST     |

| RBC Enzyme Name | HUGO symbol | Substrate | Genbank Accession #  | Protein Accession # | Clone                          | Mutation | Expression                       | Tag                |
|-----------------|-------------|-----------|----------------------|---------------------|--------------------------------|----------|----------------------------------|--------------------|
| DMPK            | DMPK        | AXLtide   | NP_004400            | Q09013              | full-length                    | -        | Insect                           | N-terminal GST     |
| DRAK1/STK17A    | STK17A      | ZIPtide   | NP_004751            | Q9UEE5              | full-length                    | -        | Insect                           | N-terminal GST     |
| DYRK1/DYRK1A    | DYRK1A      | Casein    | NP_001387            | Q13627              | full-length                    | -        | Insect                           | N-terminal GST     |
| DYRK1B          | DYRK1B      | Casein    | NP_004705            | Q9Y463              | full-length                    | -        | Insect                           | N-terminal GST     |
| DYRK2           | DYRK2       | Casein    | GenBank<br>NM_003583 | Q92630              | full length                    | -        | baculovirus in Sf21 insect cells | His6-tag           |
| DYRK3           | DYRK3       | Casein    | NP_003573            | O43781              | full length                    | -        | Insect                           | N-terminal GST     |
| DYRK4           | DYRK4       | Casein    | NP_003836.1          | Q9NR20              | full length                    | -        | Insect                           | N-terminal GST     |
| EGFR            | EGFR        | pEY + Mn  | NP_005219.2          | P00533              | cytoplasmic                    | -        | Insect                           | N-terminal GST     |
| EPHA1           | EPHA1       | pEY + Mn  | NP_005223.2          | P21709              | cytoplasmic                    | -        | Insect                           | N-terminal GST     |
| EPHA2           | EPHA2       | pEY       | NP_004422.2          | P29317              | cytoplasmic                    | -        | Insect                           | N-terminal GST     |
| EPHA3           | EPHA3       | pEY + Mn  | NP_005224            | P29320              | cytoplasmic                    | -        | Insect                           | C-terminal His     |
| EPHA4           | EPHA4       | pEY + Mn  | NP_004429.1          | P54764              | aa 616-887                     | -        | baculovirus in insect cells      | N-terminal GST     |
| EPHA5           | EPHA5       | pEY + Mn  | NP_004430.1          | P54756              | aa 595-1037                    | -        | baculovirus in insect cells      | N-terminal GST     |
| EPHA6           | EPHA6       | pEY       | NM_001080448         | Q9UF33              | Catalytic (561-end)            | -        | Insect                           | N-terminal GST     |
| EPHA7           | EPHA7       | pEY       | NP_004431.1          | Q15375              | catalytic domain (aa 579-998)  | -        | baculovirus insect cell          | N-terminal GST-tag |
| EPHA8           | EPHA8       | pEY       | NP_065387            | P29322              | catalytic domain (aa 565-1005) | -        | baculovirus insect cell          | N-terminal GST-tag |
| EPHB1           | EPHB1       | pEY       | NP_004432            | P54762              | cytoplasmic                    | -        | Insect                           | N-terminal GST     |
| EPHB2           | EPHB2       | pEY + Mn  | NP_004433            | P29323              | aa 616-889                     | -        | Insect                           | GST                |
| EPHB3           | EPHB3       | pEY       | NP_004434            | P54753              | cytoplasmic                    | -        | Insect                           | N-terminal GST     |
| EPHB4           | EPHB4       | pEY       | NP_004435            | P54760              | cytoplasmic                    | -        | Insect                           | C-terminal His     |
| ERBB2/HER2      | ERBB2       | pEY + Mn  | GenBank<br>X03363    | P04626              | aa679-1255                     | -        | Insect                           | N-terminal GST     |
| ERBB4/HER4      | ERBB4       | pEY + Mn  | NP_005226            | Q15303              | aa 708-993                     | -        | baculovirus insect cell          | N-terminal GST     |
| ERK1/MAPK3      | MAPK3       | MBP       | NP_002737            | P27361              | full-length                    | -        | Insect                           | N-terminal GST     |

| RBC Enzyme Name | HUGO symbol | Substrate                         | Genbank Accession #   | Protein Accession # | Clone       | Mutation | Expression              | Tag                    |
|-----------------|-------------|-----------------------------------|-----------------------|---------------------|-------------|----------|-------------------------|------------------------|
| ERK2/MAPK1      | MAPK1       | MBP                               | NP_620407             | P28482              | full-length | -        | E. coli                 | N-terminal GST         |
| FAK/PTK2        | PTK2        | pEY                               | NP_722560             | Q05397              | full-length | -        | Insect                  | N-terminal GST         |
| FER             | FER         | pEY                               | NP_005237             | P16591              | aa540-822   | -        | baculovirus insect cell | N-terminal GST         |
| FES/FPS         | FES         | pEY                               | NP_001996             | P07332              | full-length | -        | Insect                  | C-terminal His         |
| FGFR1           | FGFR1       | pEY + Mn                          | NP_000595             | P11362              | cytoplasmic | -        | Insect                  | C-terminal His         |
| FGFR2           | FGFR2       | pEY + Mn                          | NP_075261             | P21802              | cytoplasmic | -        | Insect                  | C-terminal His         |
| FGFR3           | FGFR3       | pEY + Mn                          | NP_000133             | P22607              | cytoplasmic | -        | Insect                  | N-terminal His         |
| FGFR4           | FGFR4       | pEY + Mn                          | NP_002002             | P22455              | aa 460-802  | -        | baculovirus insect cell | N-terminal His6-tag    |
| FGR             | FGR         | pEY                               | NP_005239             | P09769              | full-length | -        | baculovirus insect cell | C-terminal His6-tag    |
| FLT1/VEGFR 1    | FLT1        | pEY + Mn                          | NP_002010             | P17948              | aa 781-1338 | -        | baculovirus insect cell | N-terminal GST tagged  |
| FLT3            | FLT3        | Abltide                           | NP_004110             | P36888              | aa 564-958  | -        | baculovirus insect cell | C-terminal His6-tag    |
| FLT4/VEGFR 3    | FLT4        | pEY + Mn                          | NP_891555.1, AAA85215 | P35916              | aa 800-1297 | Q890H    | Insect                  | N-terminal GST         |
| FMS             | CSF1R       | pEY + Mn                          | NP_005202             | P07333              | cytoplasmic | -        | Insect                  | C-terminal His         |
| FRK/PTK5        | FRK         | pEY + Mn                          | NP_002022             | P42685              | full-length | -        | Insect                  | N-terminal GST         |
| FYN             | FYN         | pEY                               | NP_694592             | P06241              | full-length | -        | Insect                  | C-terminal His         |
| GCK/MAP4K2      | MAP4K2      | MBP                               | NP_004570.2           | Q12851              | full-length | -        | Insect                  | N-terminal His6-tagged |
| GRK2            | ADRBK1      | Casein                            | AAH37963              | P25098              | full length | -        | baculovirus insect cell | C-terminal His-tag     |
| GRK3            | ADRBK2      | Casein                            | NP_005151             | P35626              | full-length | -        | Insect                  | N-terminal GST         |
| GRK4            | GRK4        | Casein                            | NP_892027             | P32298              | full-length | -        | Insect                  | N-terminal GST         |
| GRK5            | GRK5        | Casein                            | NP_005299             | P34947              | full-length | -        | Insect                  | N-terminal GST         |
| GRK6            | GRK6        | Casein                            | NP_001004106          | P43250              | full-length | -        | Insect                  | N-terminal GST         |
| GRK7            | GRK7        | Casein                            | NP_631948             | Q8WTQ7              | full-length | -        | Insect                  | N-terminal GST         |
| GSK3a           | GSK3A       | Phospho-Glycogen Synthase peptide | NP_063937.2           | P49840              | full length | -        | baculovirus insect cell | C-terminal His-tag     |

| RBC Enzyme Name | HUGO symbol | Substrate                         | Genbank Accession # | Protein Accession # | Clone                                                    | Mutation | Expression                        | Tag                   |
|-----------------|-------------|-----------------------------------|---------------------|---------------------|----------------------------------------------------------|----------|-----------------------------------|-----------------------|
| GSK3b           | GSK3B       | Phospho-Glycogen Synthase peptide | NP_002084           | P49841              | full-length                                              |          | baculovirus insect cell           | C-terminal His6-tag   |
| Haspin          | GSG2        | Histone H3                        | NP_114171.1         | Q8TF76              | aa471-798                                                | -        | Insect                            | C-terminal His        |
| HCK             | HCK         | Src Substrate peptide             | NP_002101           | P08631              | full-length                                              | -        | Insect                            | C-terminal His        |
| HGK/MAP4K4      | MAP4K4      | MBP                               | NP_004825           | O95819              | full catalytic                                           | -        | Insect                            | N-terminal GST        |
| HIPK1           | HIPK1       | MBP                               | NP_689909           | Q86Z02              | aa 158-555                                               | -        | baculovirus insect cell           | N-terminal GST        |
| HIPK2           | HIPK2       | MBP                               | NP_073577.3         | Q9H2X6              | aa 165-564                                               | -        | baculovirus insect cell           | N-terminal GST        |
| HIPK3           | HIPK3       | MBP                               | NP_005725.2         | Q9H422              | aa 163-562                                               | -        | baculovirus insect cell           | N-terminal His6-tag   |
| HIPK4           | HIPK4       | MBP                               | NP_653286           | Q8NE63              | full-length                                              | -        | baculovirus insect cell           | N-terminal GST        |
| IGF1R           | IGF1R       | pEY + Mn                          | NP_000866           | P08069              | aa 960-1367                                              | -        | baculovirus insect cell           | C-terminal His        |
| IKKa/CHUK       | CHUK        | IKKtide                           | NP_001269           | O15111              | full-length                                              | -        | Baculovirus infected insect cells | N-terminal 6X-His tag |
| IKKb/IKBKB      | IKBKB       | IKKtide                           | NP_001547           | O14920              | full-length                                              | -        | Insect                            | N-terminal GST        |
| IKKe/IKBKE      | IKBKE       | Casein                            | NP_054721.1         | Q14164              | full-length                                              | -        | Insect                            | N-terminal GST        |
| IR              | INSR        | pEY + Mn                          |                     | P06213              | cytoplasmic domain of the $\beta$ -subunit (aa 941-1343) | -        | baculovirus expression system     | GST-tag               |
| IRAK1           | IRAK1       | MBP                               | NP_001560           | P51617              | aa 197-721                                               | -        | Baculovirus infected insect cells | N-terminal GST        |
| IRAK4           | IRAK4       | MBP                               | NP_057207, AAH13316 | Q9NWZ3              | full-length                                              | -        | baculovirus insect cell           | N-terminal His6-tag   |
| IRR/INSRR       | INSRR       | AXLtide                           | NP_055030           | P14616              | cytoplasmic                                              | -        | Insect                            | N-terminal GST        |

| RBC Enzyme Name | HUGO symbol        | Substrate | Genbank Accession #             | Protein Accession #                                         | Clone                         | Mutation | Expression                                                         | Tag                    |
|-----------------|--------------------|-----------|---------------------------------|-------------------------------------------------------------|-------------------------------|----------|--------------------------------------------------------------------|------------------------|
| ITK             | ITK                | MBP       | NP_005537                       | Q08881                                                      | full-length                   | -        | Insect                                                             | N-terminal GST         |
| JAK1            | JAK1               | pEY       | NP_002218.2                     | P23458                                                      | aa 866-1154                   | -        | Insect                                                             | N-terminal GST         |
| JAK2            | JAK2               | pEY       | NP_004963                       | O60674                                                      | aa 809-1132<br>+g             | -        | Insect                                                             | N-terminal GST         |
| JAK3            | JAK3               | JAK3tide  | NP_000206                       | P52333                                                      | aa 781-1124                   | -        | Insect                                                             | N-terminal GST         |
| JNK1            | MAPK8              | ATF2      | NP_002741.1                     | P45983-2                                                    | full length                   | -        | baculovirus insect cell, activated by MAP2K7                       | N-terminal His-tag     |
| JNK2            | MAPK9              | ATF2      | NP_002743                       | P45984-1                                                    | full length                   | -        | baculovirus in insect cell, activated by MAP2K7                    | N-terminal His-tag     |
| JNK3            | MAPK10             | ATF2      | NP_002744                       | P53779                                                      | full length                   | -        | baculovirus in insect cell                                         | N-terminal GST         |
| KDR/VEGFR2      | KDR                | pEY + Mn  | NP_002244                       | P35968                                                      | aa 789-1356                   | -        | baculovirus in insect cell, activated by autophosphorylation       | C-terminal His6-tagged |
| KHS/MAP4K5      | MAP4K5             | MBP       | NP_942089                       | Q9Y4K4                                                      | full length                   | -        | baculovirus in insect cell                                         | N-terminal GST         |
| LCK             | LCK                | pEY + Mn  | NP_005347                       | P06239                                                      | full-length                   | -        | baculovirus in insect cells                                        | C-terminal His6-tagged |
| LIMK1           | LIMK1              | Cofilin 1 | NP_002305                       | P53667                                                      | catalytic domain (aa 285-638) | -        | baculovirus in insect cells, activated by co-expression with ROCK1 | N-terminal His6-tag    |
| LKB1            | STK11/STRADA/CAB39 | LKB1tide  | NM000455/A<br>F308302/NM_016289 | STK11:Q1583<br>1;<br>STRADA:Q7<br>RTN6;<br>CAB39:Q9Y3<br>76 | full length                   | -        | baculovirus in Sf21 cells                                          |                        |

| RBC Enzyme Name   | HUGO symbol | Substrate                                   | Genbank Accession #  | Protein Accession # | Clone       | Mutation | Expression                                                                     | Tag                     |
|-------------------|-------------|---------------------------------------------|----------------------|---------------------|-------------|----------|--------------------------------------------------------------------------------|-------------------------|
| LOK/STK10         | STK10       | Axltide                                     | GenBank<br>NM_005990 | O94804              | aa 1-348    | -        | baculovirus in<br>Sf21 insect cells                                            | N-terminal His6-<br>tag |
| LRRK2             | LRRK2       | LRRKtide                                    | NP_940980.2          | Q5S007              | aa 970-2527 | -        | baculovirus in<br>insect cells                                                 | N-terminal GST          |
| LYN               | LYN         | pEY                                         | NP_002341            | P07948-1            | full length | -        | baculovirus in<br>insect cells                                                 | C-terminal His6-<br>tag |
| LYN B             | LYN         | pEY+ Mn                                     | NP_002341            | P07948-2            | full-length | -        | Insect                                                                         | C-terminal His          |
| MAPKAPK2          | MAPKAPK2    | Glycogen<br>Synthase-<br>derived<br>peptide | NP_116584            | P49137              | ful length  |          | E. coli, activated<br>by MAPK14                                                | N-terminal His-tag      |
| MAPKAPK3          | MAPKAPK3    | Glycogen<br>Synthase-<br>derived<br>peptide | NP_004626            | Q16644              | full length | -        | Insect cell,<br>activated by<br>MAPK14                                         | N-terminal His-tag      |
| MAPKAPK5/P<br>RAK | MAPKAPK5    | Glycogen<br>Synthase-<br>derived<br>peptide | NP_003659            | Q8IW41              | full length | -        | baculovirus in<br>insect cells                                                 | N-terminal His6-<br>tag |
| MARK1             | MARK1       | CHKtide                                     | NP_061120.1          | Q9P0L2              | full length | -        | baculovirus in<br>insect cells                                                 | N-terminal GST-<br>tag  |
| MARK2/PAR-<br>1Ba | MARK2       | CHKtide                                     | NP_059672.2          | Q7KZI7-4            | full length | -        | baculovirus in<br>insect cells                                                 | N-terminal GST-<br>tag  |
| MARK3             | MARK3       | CHKtide                                     | NP_002367.3          | P27448              | full length | -        | baculovirus in<br>insect cells                                                 | N-terminal GST-<br>tag  |
| MARK4             | MARK4       | CHKtide                                     | NP_113605            | Q96L34              | full length | -        | baculovirus in<br>insect cells                                                 | N-terminal GST-<br>tag  |
| MEK1              | MAP2K1      | ERK(K52R)                                   | NP_002746            | Q02750              | full length | -        | baculovirus in<br>insect cell,<br>activated by<br>RAF1 in vivo                 | N-terminal His6-<br>tag |
| MEK2              | MAP2K2      | ERK(K52R)                                   | NP_109587            | P36507              | full length | -        | baculovirus in<br>insect cells,<br>activated by co-<br>expression with<br>RAF1 | C-terminal His6-<br>tag |



| RBC Enzyme Name | HUGO symbol | Substrate                        | Genbank Accession # | Protein Accession # | Clone                        | Mutation     | Expression                        | Tag                   |
|-----------------|-------------|----------------------------------|---------------------|---------------------|------------------------------|--------------|-----------------------------------|-----------------------|
| MEKK2           | MAP3K2      | MBP                              | NM_006609           | Q9Y2U5              | full length                  | -            | baculovirus in Sf9 insect cells   | N-terminal GST-tag    |
| MEKK3           | MAP3K3      | MBP                              | NM_002401           | Q99759              | full length                  | -            | baculovirus in Sf9 insect cells   | N-terminal GST-tag    |
| MELK            | MELK        | ZIptide                          | NP_055606.1         | Q14680              | aa 1-340                     | -            | Insect cell                       | N-terminal GST-tag    |
| MINK/MINK1      | MINK1       | MBP                              | NP_056531           | Q8N4C8              | full catalytic               | -            | Insect                            | N-terminal GST        |
| MKK4            | MAP2K4      | JNK(K55M)                        | NM_003010           | P45985              | aa 33-end                    |              | baculovirus in Sf9 insect cells   | N-terminal His-tag    |
| MKK6            | MAP2K6      | MBP                              | NP_002749           | P52564              | full length                  | S207E, T211E | E. coli                           | N-terminal His-tag    |
| MLCK/MYLK       | MYLK        | ZIptide + Ca-CaM                 | NP_444253           | Q15746              | Catalytic (aa 1428-1771)     |              | Insect                            | N-terminal GST        |
| MLCK2/MYLK2     | MYLK2       | ZIptide + Ca-CaM                 | NP_149109           | Q9H1R3              | full length                  |              | Insect                            | N-terminal GST        |
| MLK1/MAP3K9     | MAP3K9      | Casein                           | NP_149132.1         | P80192              | full catalytic               | -            | Insect                            | N-terminal GST        |
| MLK2/MAP3K10    | MAP3K10     | MBP                              | NP_002437           | Q02779              | full catalytic               | -            | Insect                            | N-terminal GST        |
| MLK3/MAP3K11    | MAP3K11     | MBP                              | NP_002410.1         | Q16584              | full catalytic               | -            | Insect                            | N-terminal GST        |
| MNK1            | MKNK1       | MBP                              | GenBank NM_003684   | Q9BUB5              | aa2-end (deletion aa165-205) | T385D        | baculovirus in Sf9 insect cells   | N-terminal GST        |
| MNK2            | MKNK2       | MBP                              | NP_060042.2         | Q9HBH9              | full length                  | -            | Baculovirus infected insect cells | N-terminal GST        |
| MRCKa/CDC42BPA  | CDC42BPA    | Long S6 Kinase substrate peptide | NP_055641           | Q5VT25              | aa 1-473                     | -            | Baculovirus infected insect cells | C-terminal 6X-His tag |
| MRCKb/CDC42BPB  | CDC42BPB    | Long S6 Kinase substrate peptide | NP_006026.2         | Q9Y5S2              | aa 1-473                     | -            | Baculovirus infected insect cells | C-terminal 6X-His tag |



| RBC Enzyme Name | HUGO symbol | Substrate  | Genbank Accession # | Protein Accession # | Clone                  | Mutation          | Expression                        | Tag                    |
|-----------------|-------------|------------|---------------------|---------------------|------------------------|-------------------|-----------------------------------|------------------------|
| MSK1/RPS6KA5    | RPS6KA5     | Crosstide  | NP_004746.2         | O75582              | full-length            | -                 | Insect                            | N-terminal GST         |
| MSK2/RPS6KA4    | RPS6KA4     | Crosstide  | NP_003933           | O75676              | full-length            | -                 | Insect                            | N-terminal GST         |
| MSSK1/STK23     | SRPK3       | RS peptide | NP_055185           | Q9UPE1              | full-length            | -                 | Insect                            | N-terminal GST         |
| MST1/STK4       | STK4        | Axltide    | NP_006273           | Q13043              | full-length            | -                 | Insect                            | N-terminal GST         |
| MST2/STK3       | STK3        | MBP        | NP_006272.2         | Q13188              | full length            | -                 | Insect                            | N-terminal GST         |
| MST3/STK24      | STK24       | MBP        | NP_003567           | Q9Y6E0              | full length            | -                 | Insect                            | N-terminal GST         |
| MST4            | MST4        | MBP        | NP_057626.2         | Q9P289              | full-length            | -                 | Insect                            | N-terminal GST         |
| MUSK            | MUSK        | MBP        | NP_005583.1         | O15146              | cytoplasmic            | -                 | Insect                            | N-terminal GST         |
| MYLK3           | MYLK3       | MYLK3      | ZIPtide + Ca-CaM    | BC109097            | Q32MK0                 | full-length       | Insect                            | N-terminal GST         |
| MYO3B           | MYO3B       | MYO3B      | MBP                 | NM_138995           | Q8WXR4                 | Catalytic (1-326) | Insect                            | N-terminal GST         |
| NEK1            | NEK1        | MBP        | NP_036356           | Q96PY6              | aa 1-505               | -                 | Insect                            | N-terminal GST         |
| NEK11           | NEK11       | MBP        | NP_079076           | Q8NG66              | full-length            | -                 | Baculovirus infected insect cells | N-terminal GST         |
| NEK2            | NEK2        | MBP        | NP_002488           | P51955              | full-length            | -                 | Insect                            | C-terminal His6-tagged |
| NEK3            | NEK3        | MBP        | NP_689933           | Q8WUN5              | full-length            | -                 | Insect                            | N-terminal GST         |
| NEK4            | NEK4        | MBP        | NP_003148           | P51957              | full-length            | -                 | Insect                            | N-terminal GST         |
| NEK6            | NEK6        | MBP        | NP_055212           | Q9HC98              | aa 7-313               | -                 | baculovirus insect cell           | C-terminal His-tag     |
| NEK7            | NEK7        | MBP        | NP_598001.1         | Q8TDX7              | full length            | -                 | Insect                            | N-terminal GST tag     |
| NEK9            | NEK9        | MBP        | NP_149107.2         | Q8TD19              | Catalytic (aa 347-732) | -                 | Insect                            | N-terminal GST tag     |
| NIK/MAP3K14     | MAP3K14     | MBP        | NP_003945.2         | Q99558              | Catalytic (aa 318-947) | -                 | Insect                            | N-terminal GST tag     |
| NLK             | NLK         | MBP        | NP_057315.1         | Q9UBE8              | full length            | -                 | Insect                            | N-terminal GST         |
| OSR1/OXSR1      | OXSR1       | CATCHtide  | NP_005100.1         | O95747              | full length            | -                 | Baculovirus infected insect cells | N-terminal GST         |

| RBC Enzyme Name | HUGO symbol | Substrate                        | Genbank Accession # | Protein Accession # | Clone                  | Mutation | Expression                        | Tag                    |
|-----------------|-------------|----------------------------------|---------------------|---------------------|------------------------|----------|-----------------------------------|------------------------|
| P38a/MAPK14     | MAPK14      | MBP                              | NP_620581           | Q16539              | full-length            | -        | E. coli                           | N-terminal GST         |
| P38b/MAPK11     | MAPK11      | MBP                              | NP_002742           | Q15759              | full-length            | -        | Insect                            | N-terminal His         |
| P38d/MAPK13     | MAPK13      | MBP                              | NP_002745           | O15264              | full-length            | -        | Insect                            | N-terminal His         |
| P38g/MAPK12     | MAPK12      | MBP                              | NP_002960           | P53778              | full-length            | -        | Insect                            | N-terminal His         |
| p70S6K/RPS6KB1  | RPS6KB1     | S6K/Rsk2 peptide 2               | NP_003152, T412E    | P23443              | Catalytic (aa 1-421)   | -        | Insect                            | N-terminal GST         |
| p70S6Kb/RPS6KB2 | RPS6KB2     | S6K/Rsk2 peptide 2               | NP_003943           | Q9UBS0              | full length            | -        | Insect                            | N-terminal GST         |
| PAK1            | PAK1        | Long S6 Kinase substrate peptide | NP_002567           | Q13153              | full length            | -        | Insect                            | N-terminal GST         |
| PAK2            | PAK2        | Long S6 Kinase substrate peptide | NP_002568.2         | Q13177              | full length            | -        | Insect                            | N-terminal GST         |
| PAK3            | PAK3        | ZIPtide                          | NP_002569           | O75914              | full length            | -        | Insect                            | N-terminal His6-tag    |
| PAK4            | PAK4        | MBP                              | NP_005875           | O96013              | Catalytic (aa 295-591) | -        | Insect                            | N-terminal GST         |
| PAK5            | PAK7        | ZIPtide                          | NP_065074           | Q9P286              | aa 425-719             | -        | Baculovirus infected insect cells | N-terminal 6X-His tag  |
| PAK6            | PAK6        | ZIPtide                          | NP_064553           | Q9NQU5              | full-length            | -        | Insect                            | C-terminal His         |
| PASK            | PASK        | ZIPtide                          | NP_055963           | Q96RG2              | full catalytic         | -        | Insect                            | N-terminal GST         |
| PBK/TOPK        | PBK         | MBP                              | NP_060962           | Q96KB5              | full catalytic         | -        | Insect                            | C-terminal His         |
| PDGFRa          | PDGFRA      | pEY + Mn                         | NP_006197           | Q9DE49              | Cytoplasmic (550-1089) |          | Insect                            | N-terminal GST         |
| PDGFRb          | PDGFRB      | pEY + Mn                         | NP_002600           | P09619              | Cytoplasmic (558-1106) |          | Insect                            | N-terminal His6-tagged |

| RBC Enzyme Name | HUGO symbol | Substrate                        | Genbank Accession # | Protein Accession # | Clone             | Mutation | Expression                       | Tag                   |
|-----------------|-------------|----------------------------------|---------------------|---------------------|-------------------|----------|----------------------------------|-----------------------|
| PDK1/PDPK1      | PDPK1       | PDKtide                          | NP_002604           | O15530              | full length       | -        | Insect                           | N-terminal His6-tag   |
| PHKg1           | PHKG1       | ZIPtide                          | NP_006204           | Q16816              | full length       | -        | Insect                           | N-terminal GST-tag    |
| PHKg2           | PHKG2       | ZIPtide                          | NP_000285           | P15735              | full length       | -        | Insect                           | N-terminal GST-tag    |
| PIM1            | PIM1        | S6K/Rsk2 peptide 2               | NP_002639           | P11309              | full length       | -        | Insect                           | C-terminal His tagged |
| PIM2            | PIM2        | Pim2tide                         | NP_006866           | Q9P1W9              | full-length       | -        | Insect                           | N-terminal GST        |
| PIM3            | PIM3        | Pim2tide                         | GenBank AB114795    | Q86V86              | aa 2-end          | -        | Baculovirus in Sf21 insect cells | N-terminal His6-tag   |
| PKA             | PRKACA      | PKA sub                          | NP_002721.1         | P17612              | Catalytic (1-351) | -        | E. coli                          | N-terminal His6-tag   |
| PKAca           | KAPCA       | Long S6 Kinase substrate peptide | NM_002730           | P17612              | full-length       | -        | baculovirus in Sf9 cells         | N-terminal GST        |
| PKAcb           | KAPCB       | Long S6 Kinase substrate peptide | NM_002730           | P22694              | full-length       | -        | baculovirus in Sf9 cells         | N-terminal GST        |
| PKAcg           | KAPCG       | Long S6 Kinase substrate peptide | NM_002732           | P22612              | full-length       | -        | Insect                           | N-terminal GST        |
| PKCa            | PRKCA       | Histone H1 + Lipid Activator     | NP_002728           | P17252              | full length       | -        | Insect                           | none                  |
| PKCb1           | PRKCB1      | Histone H1 + Lipid Activator     | NP_991100.1         | P05771              | full length       | -        | baculovirus in Sf21 insect cells | none                  |
| PKCb2           | PRKCB2      | Histone H1 + Lipid Activator     | NP_002729           | P05771              | full length       | -        | insect                           | none                  |

| RBC Enzyme Name | HUGO symbol | Substrate                         | Genbank Accession # | Protein Accession # | Clone       | Mutation | Expression                       | Tag                 |
|-----------------|-------------|-----------------------------------|---------------------|---------------------|-------------|----------|----------------------------------|---------------------|
| PKCd            | PRKCD       | PKCe Pep + Lipid Activator        | NP_006245           | Q05655              | full length | -        | insect                           | none                |
| PKCepsilon      | PRKCE       | S25 PKC Peptide                   | NP_005391.1         | Q02156              | full-length | -        | Insect                           | none                |
| PKCeta          | PRKCH       | PKCe Pep + Lipid Activator        | NM_006255           | P24723              | full length | -        | baculovirus in Sf9 insect cells  | N-terminal GST      |
| PKCg            | PRKCG       | Histone H1 + Lipid Activator      | NP_002730           | P05129              | -           | -        | baculovirus in insect cells      | none                |
| PKCiota         | PRKCI       | PKCepsilon Peptide                | NP_002731           | P41743              | full length | -        | baculovirus insect cell          | N-terminal His-tag  |
| PKCmu/PRKD1     | PRKD1       | Glycogen Synthase-derived peptide | NP_002733           | Q15139              | full length | -        | Insect                           | N-terminal GST      |
| PKCnu/PRKD3     | PRKD3       | Glycogen Synthase-derived peptide | NP_005804           | O94806              | full-length | -        | Insect                           | N-terminal GST      |
| PKCtheta        | PRKCQ       | Histone H1 + Lipid Activator      | NP_006248           | Q04759              | full length | P330L    | baculovirus in insect cells      | C-terminal His6-tag |
| PKCzeta         | PRKCZ       | PKCepsilon Peptide                | NP_002735           | Q05513              | full-length | -        | Insect                           | none                |
| PKD2/PRKD2      | PRKD2       | Glycogen Synthase-derived peptide | NP_057541           | Q9BZL6              | full-length | -        | Insect                           | N-terminal GST      |
| PKG1a           | PRKG1       | Kemptide                          | NM_001098512        | Q13976              | full length | -        | baculovirus in Sf9 cells         | N-terminal His6-tag |
| PKG1b           | PRKG1       | Kemptide                          | GenBank NM_006258   | P14619              | full length | -        | baculovirus in Sf21 insect cells | N-terminal His6-tag |
| PKG2/PRKG2      | PRKG2       | Kemptide                          | NP_006250           | Q13237              | full length | -        | Insect                           | N-terminal GST      |

| RBC Enzyme Name | HUGO symbol | Substrate                         | Genbank Accession # | Protein Accession # | Clone              | Mutation | Expression                        | Tag                     |
|-----------------|-------------|-----------------------------------|---------------------|---------------------|--------------------|----------|-----------------------------------|-------------------------|
| PKN1/PRK1       | PKN1        | Glycogen Synthase-derived peptide | NP_998725           | Q16512              | full length        | -        | Insect                            | N-terminal GST          |
| PKN2/PRK2       | PKN2        | Glycogen Synthase-derived peptide | NP_006247           | Q16513              | full length        | -        | Insect                            | N-terminal GST          |
| PLK1            | PLK1        | Casein                            | NP_005021           | P53350              | full length        | -        | Insect                            | C-terminal His6-tag     |
| PLK2            | PLK2        | Casein                            | NP_006613           | Q9NYY3              | full length        | -        | Insect                            | N-terminal GST-His6 tag |
| PLK3            | PLK3        | Casein                            | NP_004064           | Q9H4B4              | Catalytic (58-340) | -        | Insect                            | N-terminal GST          |
| PRKX            | PRKX        | Kemptide                          | NP_722560           | P51817              | full length        | -        | Insect                            | N-terminal GST          |
| PYK2            | PTK2B       | pEY + Mn                          | NP_004094           | Q14289              | full-length        | -        | Insect                            | N-terminal GST          |
| RAF1            | RAF1        | MEK1 (K97R)                       | NP_002871           | P04049              | full catalytic     | -        | Insect                            | N-terminal GST          |
| RET             | RET         | CHKtide                           | NP_066124           | P07949              | cytoplasmic        | -        | Insect                            | N-terminal GST          |
| RIPK2           | RIPK2       | MBP                               | NP_003812           | O43353              | aa 1-299           | -        | Baculovirus infected insect cells | N-terminal 6X-His tag   |
| RIPK5           | DSTYK       | MBP                               | NP_056190.1         | Q6XUX3              | full length        | -        | Insect                            | N-terminal GST          |
| ROCK1           | ROCK1       | Long S6 Kinase substrate peptide  | NP_005397           | Q13464              | aa 1-535           | -        | Insect                            | N-terminal GST          |
| ROCK2           | ROCK2       | Long S6 Kinase substrate peptide  | NM_004850           | O75116              | aa 5-554           | -        | baculovirus in Sf9 insect cells   | N-terminal GST          |
| RON/MST1R       | MST1R       | Axltide + Mn                      | NP_002438           | Q04912              | aa 983-1400        | -        | Baculovirus infected insect cells | N-terminal GST          |
| ROS/ROS1        | ROS1        | IGF-1Rtide                        | NP_002935           | P08922              | cytoplasmic        | -        | Insect                            | N-terminal GST          |

| RBC Enzyme Name | HUGO symbol | Substrate                         | Genbank Accession # | Protein Accession # | Clone                     | Mutation | Expression                      | Tag                            |
|-----------------|-------------|-----------------------------------|---------------------|---------------------|---------------------------|----------|---------------------------------|--------------------------------|
| RSK1            | RPS6KA1     | Glycogen Synthase-derived peptide | NP_002944           | Q15418              | full length               | -        | Insect                          | N-terminal His6-tag            |
| RSK2            | RPS6KA3     | Glycogen Synthase-derived peptide | NP_004577           | P51812              | full length               | -        | baculovirus insect cell         | C-terminal His-tag             |
| RSK3            | RPS6KA2     | Glycogen Synthase-derived peptide | NP_066958           | Q15349              | full length               | -        | Insect                          | N-terminal His6-tag            |
| RSK4            | RPS6KA6     | Long S6 Kinase substrate peptide  | NP_055311           | Q9UK32              | full-length               | -        | Insect                          | N-terminal GST                 |
| SGK1            | SGK1        | Crosstide                         | NP_005618, S589D    | O00141              | Catalytic (60-431)        | S422D    | Insect                          | N-terminal GST                 |
| SGK2            | SGK2        | Crosstide                         |                     | Q9HBY8              | full length (Met1-Cys367) | -        | baculovirus expression system   | GST-tag                        |
| SGK3/SGKL       | SGK3        | Crosstide                         | NP_037389, S487D    | Q96BR1              | Catalytic (87-496)        | -        | Insect                          | N-terminal GST-tag             |
| SIK2            | SIK2        | Kemptide                          | NP_056006.1         | Q9H0K1              | full length               | -        | Insect                          | N-terminal GST-tag             |
| SLK/STK2        | SLK         | Histone H3                        | NP_055535.1         | Q9H2G2              | full length               | -        | Insect                          | N-terminal GST-tag             |
| SNARK/NUAK2     | NUAK2       | MBP                               | NM_030952           | Q9H093              | aa M1-T628                | -        | baculovirus in Sf9 insect cells | N-terminally fused to GST-His6 |
| SRMS            | SRMS        | pEY + Mn                          | NP_543013           | Q9H3Y6              | full length               | -        | Insect                          | N-terminal GST                 |
| SRPK1           | SRPK1       | RS peptide                        | NP_003128           | Q96SB4              | full length               | -        | Insect                          | N-terminal His-tag             |
| SRPK2           | SRPK2       | RS peptide                        | NP_872633           | P78362              | full length               | -        | Insect                          | N-terminal GST-tag             |
| STK16           | STK16       | MBP                               | NP_003682           | O75716              | full length               | -        | Insect                          | N-terminal His-tag             |

| RBC Enzyme Name | HUGO symbol          | Substrate | Genbank Accession #     | Protein Accession #               | Clone                                             | Mutation               | Expression                              | Tag                      |
|-----------------|----------------------|-----------|-------------------------|-----------------------------------|---------------------------------------------------|------------------------|-----------------------------------------|--------------------------|
| STK22D/TSSK1    | TSSK1B               | CHKtide   | NP_114417               | Q9BXA7                            | full length                                       | -                      | Insect                                  | C-terminal His-tag       |
| STK25/YSK1      | STK25                | MBP       | NP_006365               | O00506                            | full length                                       | -                      | Insect                                  | N-terminal GST           |
| STK33           | STK33                | MBP       | NP_112168               | Q9BYT3                            | full length                                       | -                      | Insect                                  | N-terminal His-tag       |
| STK38/NDR1      | STK38/NDR1           | STK38     | Modified PKA Substrate  | NM_007271                         | Q15208                                            | full-length            | Insect                                  | N-terminal GST           |
| STK39/STLK3     | STK39                | CATCHtide | NP_037365.2             | Q9UEW8                            | full length                                       | -                      | Insect                                  | N-terminal GST           |
| SYK             | SYK                  | pEY       | NP_003168               | P43405                            | full-length                                       | -                      | Insect                                  | N-terminal GST           |
| TAK1            | MAP3K7/MA<br>P3K7IP1 | Casein    | NP_663306,<br>NP_006107 | MAP3K7:O43<br>318;<br>TAB1:Q15750 | full-length<br>MAP3K7; aa<br>437-504<br>MAP3K7IP1 | -                      | Baculovirus<br>infected insect<br>cells | N-terminal 6X-His<br>tag |
| TAOK1           | TAOK1                | MBP       | NM_020791               | Q7L7X3                            | aa1-314                                           | -                      | baculovirus in<br>Sf9 insect cells      | N-terminal GST           |
| TAOK2           | TAOK2                | MBP       | NP_004774               | Q9UL54                            | full catalytic                                    | -                      | Insect                                  | N-terminal GST           |
| TAOK3/JIK       | TAOK3                | MBP       | NP_057365               | Q9H2K8                            | full-length                                       | -                      | Insect                                  | N-terminal GST           |
| TBK1            | TBK1                 | CK1tide   | NP_037386               | Q9UHD2                            | full-length                                       | -                      | Insect                                  | N-terminal GST           |
| TEC             | TEC                  | pEY + Mn  | NP_003206               | P42680                            | full length                                       | -                      | baculovirus<br>insect cell              | C-terminal His-tag       |
| TGFBR2          | TGFBR2               | MBP       | NM_003242               | P37173                            | 190-end                                           | -                      | baculovirus in<br>Sf9 insect cells      | N-terminal GST           |
| TIE2/TEK        | TEK                  | pEY + Mn  | NP_000450               | Q02763                            | Cytoplasmic<br>(817-1101)                         | -                      | Insect                                  | N-terminal GST-<br>tag   |
| TLK2            | TLK2                 | TLK2      | Casein                  | NM_006852                         | Q86UE8                                            | Catalytic<br>(388-end) | Insect                                  | N-terminal GST           |
| TRKA            | NTRK1                | pEY + Mn  | NP_002520               | P04629                            | Cytoplasmic<br>(441-796)                          | -                      | insect                                  | C-terminal His-tag       |
| TRKB            | NTRK2                | pEY + Mn  | NP_006171               | Q16620                            | Cytoplasmic<br>(526-838)                          | -                      | Insect                                  | C-terminal His-tag       |
| TRKC            | NTRK3                | pEY       | NP_002521.2             | Q16288                            | catalytic<br>domain (aa<br>510-825)               | -                      | baculovirus<br>insect cell              | C-terminal His-tag       |
| TSSK2           | TSSK2                | CHKtide   | NP_443732               | Q96PF2                            | full length                                       | -                      | Insect                                  | N-terminal His6-<br>tag  |

| RBC Enzyme Name | HUGO symbol | Substrate | Genbank Accession # | Protein Accession # | Clone                    | Mutation    | Expression                      | Tag                 |
|-----------------|-------------|-----------|---------------------|---------------------|--------------------------|-------------|---------------------------------|---------------------|
| TTK             | TTK         | MBP       | NP_003309           | P33981              | full-length              | -           | Insect                          | N-terminal          |
| TXK             | TXK         | ABLtide   | NP_003319.2         | P42681              | full length              | -           | Insect                          | N-terminal GST-tag  |
| TYK1/LTK        | LTK         | ABLtide   | NP_002335.2         | P29376              | Cytoplasmic (450-864)    | -           | Insect                          | N-terminal GST-tag  |
| TYK2            | TYK2        | AXLtide   | NP_003322.2         | P29597              | aa 833-1187              | -           | Insect                          | N-terminal GST      |
| TYRO3/SKY       | TYRO3       | pEY + Mn  | NP_006284           | Q06418              | Cytoplasmic (451-890)    | -           | Insect                          | N-terminal GST-tag  |
| ULK1            | ULK1        | MBP       | BC111603            | O75385              | aa 1-649                 | -           | baculovirus in Sf9 insect cells | N-terminal GST-tag  |
| ULK2            | ULK2        | MBP       | NM_014683           | Q8IYT8              | aa 1-631                 | -           | baculovirus in Sf9 insect cells | N-terminal GST-tag  |
| ULK3            | ULK3        | ULK3      | Casein              | BC157884            | Q6PHR2                   | full-length | Insect                          | N-terminal His6-tag |
| VRK1            | VRK1        | Casein    | NM_003384           | Q99986              | full length, Met1-Lys396 | -           | Sf9 cells                       | GST-HIS fusion      |
| WEE1            | WEE1        | MBP       | NP_003381.1         | P30291              | full-length              | -           | Insect                          | N-terminal          |
| WNK2            | WNK2        | MBP       | NP_006639.3         | Q9Y3S1              | Catalytic (166-489)      | -           | Insect                          | N-terminal GST      |
| WNK3            | WNK3        | MBP       | NP_065973           | Q9BYP7              | Catalytic (1-434)        | -           | Insect                          | N-terminal His6-tag |
| YES/YES1        | YES1        | pEY       | NP_005424           | P07947              | full length              | -           | Insect                          | C-terminal His-tag  |
| ZAK/MLTK        | ZAK         | MBP       | NP_598407.1         | Q9NYL2              | full length              | -           | Insect                          | N-terminal GST      |
| ZAP70           | ZAP70       | pEY       | NP_001070           | P43403              | full length              | -           | Insect                          | C-terminal His6-tag |
| ZIPK/DAPK3      | DAPK3       | ZIPtide   | NP_001339           | O43293              | full-length              | -           | Insect                          | N-terminal GST      |



**Supplementary Table 4.** A ranked table of kinases sorted by Selectivity score, the fraction of all tested inhibitors that inhibited the catalytic activity of the test kinase by >50%.

| Kinase         | Selectivity Score |
|----------------|-------------------|
| COT1/MAP3K8    | 0.000             |
| CTK MATK       | 0.000             |
| DYRK4          | 0.000             |
| GRK2           | 0.000             |
| GRK3           | 0.000             |
| HIPK1          | 0.000             |
| JNK3           | 0.000             |
| MAPKAPK3       | 0.000             |
| NEK6           | 0.000             |
| NEK7           | 0.000             |
| P38d/MAPK13    | 0.000             |
| P38g           | 0.000             |
| VRK1           | 0.000             |
| WNK3           | 0.000             |
| ALK2/ACVR1     | 0.006             |
| CAMK1b         | 0.006             |
| CAMK4          | 0.006             |
| DMPK           | 0.006             |
| GRK5           | 0.006             |
| NEK2           | 0.006             |
| NEK3           | 0.006             |
| OSR1/OXSR1     | 0.006             |
| PLK2           | 0.006             |
| RON/MST1R      | 0.006             |
| SGK3/SGKL      | 0.006             |
| STK39/STLK3    | 0.006             |
| WNK2           | 0.006             |
| MRCKa/CDC42BPA | 0.006             |
| AKT2           | 0.011             |
| ALK4/ACVR1B    | 0.011             |
| CDK7/cyclin H  | 0.011             |
| DCAMKL2        | 0.011             |
| ERK1           | 0.011             |
| ERK2 MAPK1     | 0.011             |
| HIPK4          | 0.011             |
| IKKa/CHUK      | 0.011             |
| JNK1           | 0.011             |
| MAPKAPK2       | 0.011             |
| MRCKb/CDC42BPB | 0.011             |
| NEK11          | 0.011             |
| PKCzeta        | 0.011             |
| SRPK1          | 0.011             |
| TSSK2          | 0.011             |
| WEE1           | 0.011             |
| ZAP70          | 0.011             |
| AKT1           | 0.011             |
| ALK5/TGFBR1    | 0.011             |
| CAMK1a         | 0.011             |
| MAPKAPK5/PRAK  | 0.011             |
| NIK/MAP3K14    | 0.011             |
| ALK1/ACVRL1    | 0.017             |
| BRAF           | 0.017             |
| c-MET          | 0.017             |
| FGFR4          | 0.017             |

| Kinase          | Selectivity Score |
|-----------------|-------------------|
| GRK4            | 0.017             |
| HIPK2           | 0.017             |
| HIPK3           | 0.017             |
| IKKb/IKBKB      | 0.017             |
| PKCiota         | 0.017             |
| PAK6            | 0.017             |
| CK1g1           | 0.022             |
| MEK1            | 0.022             |
| MKK6            | 0.022             |
| MSSK1/STK23     | 0.022             |
| p70S6Kb/RPS6KB2 | 0.022             |
| PAK4            | 0.022             |
| SRMS            | 0.022             |
| TEC             | 0.022             |
| AKT3            | 0.023             |
| CAMK1g          | 0.023             |
| DAPK2           | 0.023             |
| PBK/TOPK        | 0.023             |
| TIE2/TEK        | 0.023             |
| SRPK2           | 0.023             |
| EPHB3           | 0.023             |
| ASK1/MAP3K5     | 0.028             |
| EPHA8           | 0.028             |
| NEK9            | 0.028             |
| PAK2            | 0.028             |
| PAK3            | 0.028             |
| RIPK5           | 0.028             |
| TGFBR2          | 0.028             |
| TTK             | 0.028             |
| ZIPK/DAPK3      | 0.028             |
| CK1g2           | 0.028             |
| DYRK3           | 0.028             |
| CAMK1d          | 0.028             |
| PKAcg           | 0.031             |
| EPHA3           | 0.034             |
| EPHA5           | 0.034             |
| EPHA7           | 0.034             |
| GRK6            | 0.034             |
| GRK7            | 0.034             |
| MEK2            | 0.034             |
| P38b/MAPK11     | 0.034             |
| PAK5            | 0.034             |
| PIM2            | 0.034             |
| PKCg            | 0.034             |
| PKG1b           | 0.034             |
| PKN2/PRK2       | 0.034             |
| PLK1            | 0.034             |
| STK25/YSK1      | 0.034             |
| PKA             | 0.034             |
| SGK2            | 0.034             |
| CK1g3           | 0.039             |
| EPHA1           | 0.039             |
| IGF1R           | 0.039             |
| NEK4            | 0.039             |

| <b>Kinase</b>  | <b>Selectivity Score</b> |
|----------------|--------------------------|
| PAK1           | 0.039                    |
| PASK           | 0.039                    |
| PLK3           | 0.039                    |
| PRKX           | 0.039                    |
| ARAF           | 0.040                    |
| PDK1/PDPK1     | 0.040                    |
| CK1a1          | 0.040                    |
| STK38/NDR1     | 0.040                    |
| CAMK2b         | 0.045                    |
| DAPK1          | 0.045                    |
| DDR2           | 0.045                    |
| EPHA4          | 0.045                    |
| EPHB2          | 0.045                    |
| PHKg2          | 0.045                    |
| RAF1           | 0.045                    |
| TLK2           | 0.050                    |
| FAK/PTK2       | 0.051                    |
| IR             | 0.051                    |
| PKCtheta       | 0.051                    |
| SGK1           | 0.051                    |
| SNARK/NUAK2    | 0.051                    |
| NEK1           | 0.051                    |
| PKG1a          | 0.051                    |
| TAOK2/TAO1     | 0.051                    |
| ZAK/MLTK       | 0.051                    |
| CK2a           | 0.051                    |
| EPHB4          | 0.052                    |
| CAMK2g         | 0.056                    |
| CSK            | 0.056                    |
| ITK            | 0.056                    |
| ROCK1          | 0.056                    |
| TYRO3 SKY      | 0.056                    |
| ULK2           | 0.056                    |
| EPHB1          | 0.056                    |
| FES/FPS        | 0.056                    |
| IRR/INSRR      | 0.056                    |
| TAOK1          | 0.056                    |
| TAOK3/JIK      | 0.056                    |
| CDK4/cyclin D1 | 0.062                    |
| CLK3           | 0.062                    |
| DYRK2          | 0.062                    |
| EPHA2          | 0.062                    |
| FRK/PTK5       | 0.062                    |
| JAK1           | 0.062                    |
| MNK1           | 0.062                    |
| MSK1/RPS6KA5   | 0.062                    |
| PKCb1          | 0.062                    |
| JNK2           | 0.062                    |
| P38a/MAPK14    | 0.062                    |
| CK2a2          | 0.067                    |
| CDK4/cyclin D3 | 0.067                    |
| FGFR2          | 0.067                    |
| IKKe/IKBKE     | 0.067                    |
| IRAK4          | 0.067                    |

| <b>Kinase</b>  | <b>Selectivity Score</b> |
|----------------|--------------------------|
| MEKK2          | 0.067                    |
| PKCb2          | 0.067                    |
| PKG2/PRKG2     | 0.067                    |
| CAMKK1         | 0.068                    |
| CDK1/cyclin A  | 0.068                    |
| MST4           | 0.068                    |
| PKCepsilon     | 0.068                    |
| PKCa           | 0.068                    |
| IRAK1          | 0.073                    |
| MEKK3          | 0.073                    |
| PYK2           | 0.073                    |
| SYK            | 0.073                    |
| ALK            | 0.073                    |
| DYRK1/DYRK1A   | 0.073                    |
| ERBB4/HER4     | 0.073                    |
| MARK3          | 0.073                    |
| NLK            | 0.073                    |
| CLK1           | 0.074                    |
| AXL            | 0.079                    |
| CAMK2a         | 0.079                    |
| CAMK2d         | 0.079                    |
| CDK3/cyclin E  | 0.079                    |
| c-MER          | 0.079                    |
| ERBB2/HER2     | 0.079                    |
| FGFR3          | 0.079                    |
| Haspin         | 0.079                    |
| MLK2/MAP3K10   | 0.079                    |
| MUSK           | 0.079                    |
| PKCeta         | 0.079                    |
| ROCK2          | 0.079                    |
| STK16          | 0.079                    |
| ULK1           | 0.079                    |
| MSK2/RPS6KA4   | 0.079                    |
| MYO3b          | 0.080                    |
| ULK3           | 0.080                    |
| CAMKK2         | 0.084                    |
| CDK9/cyclin T1 | 0.084                    |
| DYRK1B         | 0.084                    |
| JAK2           | 0.084                    |
| LKB1           | 0.084                    |
| MARK1          | 0.084                    |
| PKCmu/PRKD1    | 0.084                    |
| TYK1/LTK       | 0.084                    |
| STK22D/TSSK1   | 0.085                    |
| FER            | 0.090                    |
| FGFR1          | 0.090                    |
| FLT1/VEGFR1    | 0.090                    |
| LIMK1          | 0.090                    |
| MARK2/PAR-1Ba  | 0.090                    |
| MST3/STK24     | 0.090                    |
| STK33          | 0.090                    |
| PKD2/PRKD2     | 0.090                    |
| TAK1           | 0.090                    |
| TBK1           | 0.090                    |

| <b>Kinase</b>  | <b>Selectivity Score</b> |
|----------------|--------------------------|
| BMX/ETK        | 0.096                    |
| MLCK/MYLK      | 0.096                    |
| PKCd           | 0.096                    |
| ROS/ROS1       | 0.096                    |
| SIK2           | 0.096                    |
| CHK1           | 0.096                    |
| p70S6K/RPS6KB1 | 0.096                    |
| CDK6/cyclin D1 | 0.101                    |
| LYN B          | 0.101                    |
| MNK2           | 0.101                    |
| DRAK1/STK17A   | 0.107                    |
| PIM1           | 0.107                    |
| SLK/STK2       | 0.107                    |
| TXK            | 0.107                    |
| BRSK2          | 0.112                    |
| EGFR           | 0.112                    |
| MARK4          | 0.114                    |
| ABL1           | 0.118                    |
| Aurora C       | 0.118                    |
| CDK9 cyclin K  | 0.118                    |
| CK1d           | 0.118                    |
| CK1epsilon     | 0.118                    |
| JAK3           | 0.118                    |
| KDR/VEGFR2     | 0.118                    |
| PIM3           | 0.118                    |
| PKCnu/PRKD3    | 0.118                    |
| PKN1/PRK1      | 0.119                    |
| BLK            | 0.124                    |
| BRK            | 0.124                    |
| CDK1/cyclin B  | 0.124                    |
| PDGFRa         | 0.124                    |
| TRKA           | 0.124                    |
| HCK            | 0.124                    |
| BTK            | 0.129                    |
| RIPK2          | 0.129                    |
| BRSK1          | 0.130                    |
| CDK6/cyclin D3 | 0.130                    |
| CLK2           | 0.135                    |
| MELK           | 0.135                    |
| MLCK2/MYLK2    | 0.135                    |
| ABL2/ARG       | 0.140                    |
| Aurora A       | 0.140                    |
| CDK2/cyclin A  | 0.140                    |
| CDK2/cyclin E  | 0.140                    |
| CDK5/p25       | 0.140                    |
| c-SRC          | 0.140                    |
| MINK/MINK1     | 0.140                    |
| PHKg1          | 0.140                    |
| CDK5/p35       | 0.146                    |
| GCK MAP4K2     | 0.146                    |
| LRRK2          | 0.146                    |
| RSK2           | 0.146                    |
| RSK1           | 0.147                    |
| FYN            | 0.152                    |

| <b>Kinase</b> | <b>Selectivity Score</b> |
|---------------|--------------------------|
| MST2/STK3     | 0.153                    |
| CHK2          | 0.157                    |
| GSK3b         | 0.157                    |
| TYK2          | 0.157                    |
| CLK4          | 0.163                    |
| FLT4/VEGFR3   | 0.163                    |
| PDGFRb        | 0.164                    |
| GSK3a         | 0.169                    |
| LCK           | 0.169                    |
| LYN           | 0.174                    |
| MST1/STK4     | 0.174                    |
| RSK4          | 0.174                    |
| Aurora B      | 0.180                    |
| EPHA6         | 0.180                    |
| ACK1          | 0.191                    |
| FGR           | 0.191                    |
| RSK3          | 0.191                    |
| TRKB          | 0.191                    |
| LOK/STK10     | 0.198                    |
| FMS           | 0.202                    |
| MLK1/MAP3K9   | 0.202                    |
| MLK3/MAP3K11  | 0.202                    |
| c-Kit         | 0.208                    |
| YES/YES1      | 0.242                    |
| ARK5/NUAK1    | 0.249                    |
| RET           | 0.253                    |
| KHS MAP4K5    | 0.254                    |
| HGK MAP4K4    | 0.264                    |
| TRKC          | 0.271                    |
| FLT3          | 0.410                    |

**Supplementary Table 5.** A ranked table of compounds sorted by Gini score.

| CAS #       | Inhibitor name                      | Gini score | CAS #       | Inhibitor name                             | Gini score |
|-------------|-------------------------------------|------------|-------------|--------------------------------------------|------------|
| 62996-74-1  | Staurosporine, Streptomyces sp.     | 0.20       | 404828-08-6 | GSK-3 Inhibitor XIII                       | 0.57       |
| 97161-97-2  | K-252a, Nocardiosis sp.             | 0.29       | 15966-93-5  | VEGF Receptor 2 Kinase Inhibitor I         | 0.57       |
| 135897-06-2 | SB 218078                           | 0.36       | 371935-74-9 | PI-103                                     | 0.57       |
| 443798-55-8 | Cdk1/2 Inhibitor III                | 0.37       | 546102-60-7 | Cdk4 Inhibitor                             | 0.57       |
| 608512-97-6 | PKR Inhibitor                       | 0.44       | 40254-90-8  | Cdk1/5 Inhibitor                           | 0.57       |
| 854171-35-0 | Indirubin Derivative E804           | 0.48       | 496864-16-5 | Aloisine A, RP107                          | 0.57       |
| 136194-77-9 | Gö 6976                             | 0.49       | 740841-15-0 | GSK-3 Inhibitor X                          | 0.57       |
| 856436-16-3 | JAK3 Inhibitor VI                   | 0.49       | 507475-17-4 | IKK-2 Inhibitor IV                         | 0.58       |
| 326914-10-7 | SU11652                             | 0.50       | 227449-73-2 | Syk Inhibitor II                           | 0.58       |
| 557795-19-4 | Sunitinib                           | 0.52       | 265312-55-8 | Cdk4 Inhibitor III                         | 0.58       |
| 120685-11-2 | Staurosporine, N-benzoyl-           | 0.52       | 129-56-6    | JNK Inhibitor II                           | 0.58       |
| 244148-46-7 | Isogranulatimide                    | 0.52       | 667463-62-9 | GSK-3 Inhibitor IX                         | 0.58       |
| 146535-11-7 | AG 1296                             | 0.53       | 19545-26-7  | Wortmannin                                 | 0.59       |
| 331253-86-2 | PDK1/Akt/Flt Dual Pathway Inhibitor | 0.54       | 249762-74-1 | PDGF Receptor Tyrosine Kinase Inhibitor II | 0.59       |
| 457081-03-7 | JAK Inhibitor I                     | 0.54       | 167869-21-8 | PD 98059                                   | 0.59       |
| 622387-85-3 | Syk Inhibitor                       | 0.54       | 288144-20-7 | VEGF Receptor 2 Kinase Inhibitor II        | 0.59       |
| 5334-30-5   | PP3                                 | 0.55       | 114719-57-2 | Fascaplysin, Synthetic                     | 0.59       |
| 444723-13-1 | Cdk2 Inhibitor IV, NU6140           | 0.56       | 443797-96-4 | Aurora Kinase/Cdk Inhibitor                | 0.59       |
| 216661-57-3 | VEGF Receptor 2 Kinase Inhibitor IV | 0.56       | 133053-19-7 | Gö 6983                                    | 0.59       |
| 160807-49-8 | Indirubin-3'-monoxime               | 0.56       | 175178-82-2 | AG 1478                                    | 0.60       |
| 866405-64-3 | AMPK Inhibitor, Compound C          | 0.56       | 934358-00-6 | Casein Kinase II Inhibitor III, TBCA       | 0.60       |

| CAS #       | Inhibitor name                              | Gini score | CAS #       | Inhibitor name                                      | Gini score |
|-------------|---------------------------------------------|------------|-------------|-----------------------------------------------------|------------|
| 269390-69-4 | VEGF Receptor Tyrosine Kinase Inhibitor II  | 0.60       | 219138-24-6 | p38 MAP Kinase Inhibitor                            | 0.62       |
| 171179-06-9 | PD 158780                                   | 0.60       | 601514-19-6 | GSK3b Inhibitor XII, TWS119                         | 0.62       |
| 133052-90-1 | Bisindolylmaleimide I                       | 0.60       | 145915-60-2 | PKCbII/EGFR Inhibitor                               | 0.62       |
| 71897-07-9  | AG 1295                                     | 0.60       | 522629-08-9 | MNK1 Inhibitor                                      | 0.63       |
| 852547-30-9 | PKR Inhibitor, Negative Control             | 0.60       | 648449-76-7 | PI 3-Kg Inhibitor II                                | 0.63       |
| 216163-53-0 | PD 174265                                   | 0.60       | 516480-79-8 | Chk2 Inhibitor II                                   | 0.63       |
| 204005-46-9 | VEGF Receptor 2 Kinase Inhibitor III        | 0.60       | 626604-39-5 | GSK-3b Inhibitor XI                                 | 0.63       |
| 212779-48-1 | Compound 52                                 | 0.60       | 658084-23-2 | Met Kinase Inhibitor                                | 0.63       |
| 380843-75-4 | Bosutinib                                   | 0.61       | 286370-15-8 | VEGF Receptor Tyrosine Kinase Inhibitor III, KRN633 | 0.63       |
| 496864-15-4 | Aloisine, RP106                             | 0.61       | 211555-04-3 | JAK3 Inhibitor II                                   | 0.63       |
| 141992-47-4 | Cdk4 Inhibitor II, NSC 625987               | 0.61       | 103745-39-7 | HA 1077, Dihydrochloride Fasudil                    | 0.63       |
| 405169-16-6 | Dovitinib                                   | 0.61       | 190654-01-4 | Cdk1 Inhibitor, CGP74514A                           | 0.63       |
| 3895-92-9   | Chelerythrine Chloride                      | 0.61       | 54642-23-8  | JNK Inhibitor, Negative Control                     | 0.63       |
| 220749-41-7 | Cdk1 Inhibitor                              | 0.61       | 581098-48-8 | p38 MAP Kinase Inhibitor III                        | 0.63       |
| 852527-97-0 | Alsterpaullone, 2-Cyanoethyl                | 0.61       | 666837-93-0 | SU9516                                              | 0.64       |
| 146986-50-7 | ROCK Inhibitor, Y-27632                     | 0.61       | 345616-52-6 | ERK Inhibitor III                                   | 0.64       |
| 144978-82-5 | AG 112                                      | 0.61       | 778270-11-4 | Bcr-abl Inhibitor                                   | 0.64       |
| 871307-18-5 | Tpl2 Kinase Inhibitor                       | 0.61       | 70563-58-5  | Herbimycin A, Streptomyces sp.                      | 0.64       |
| 205254-94-0 | PDGF Receptor Tyrosine Kinase Inhibitor III | 0.62       | 34823-86-4  | GTP-14564                                           | 0.64       |
| 896138-40-2 | Flt-3 Inhibitor II                          | 0.62       | 189232-42-6 | Bohemine                                            | 0.64       |
| 220792-57-4 | Aminopurvalanol A                           | 0.62       | 648450-29-7 | PI 3-Kg Inhibitor                                   | 0.64       |

| CAS #       | Inhibitor name                             | Gini score | CAS #       | Inhibitor name                    | Gini score |
|-------------|--------------------------------------------|------------|-------------|-----------------------------------|------------|
| 2826-26-8   | AG 9                                       | 0.64       | 154447-36-6 | LY 294002                         | 0.68       |
| 58753-54-1  | JAK3 Inhibitor IV                          | 0.65       | 171745-13-4 | Compound 56                       | 0.68       |
| 237430-03-4 | Alsterpaullone                             | 0.65       | 681281-88-9 | Akt Inhibitor IV                  | 0.68       |
| 199986-75-9 | Cdk2 Inhibitor III                         | 0.65       | 301836-43-1 | Casein Kinase I Inhibitor, D4476  | 0.68       |
| 330161-87-0 | SU6656                                     | 0.65       | 639089-54-6 | Tozasertib                        | 0.68       |
| 852045-46-6 | Flt-3 Inhibitor III                        | 0.65       | 139298-40-1 | KN-93                             | 0.69       |
| 127243-85-0 | H-89, Dihydrochloride                      | 0.65       | 396129-53-6 | TGF- $\beta$ RI Kinase Inhibitor  | 0.69       |
| 119139-23-0 | Bisindolylmaleimide IV                     | 0.65       | 327036-89-5 | GSK-3 $\beta$ Inhibitor I         | 0.69       |
| 627518-40-5 | PDGF Receptor Tyrosine Kinase Inhibitor IV | 0.66       | 212844-53-6 | Purvalanol A                      | 0.69       |
| 152121-53-4 | PD 169316                                  | 0.66       | 257879-35-9 | PKC $\beta$ Inhibitor             | 0.69       |
| 1485-00-3   | Syk Inhibitor III                          | 0.66       | 300801-52-9 | Cdc2-Like Kinase Inhibitor, TG003 | 0.69       |
| 186611-52-9 | IC261                                      | 0.66       | 154447-38-8 | LY 303511- Negative control       | 0.69       |
| 133550-30-8 | AG 490                                     | 0.66       | 184475-35-2 | Gefitinib                         | 0.69       |
| 879127-16-9 | Aurora Kinase Inhibitor III                | 0.66       | 19542-67-7  | BAY 11-7082                       | 0.69       |
| 221244-14-0 | PP1 Analog II, 1NM-PP1                     | 0.67       | 366017-09-6 | Mubritinib                        | 0.70       |
| 196868-63-0 | IGF-1R Inhibitor II                        | 0.67       | 509093-47-4 | IRAK-1/4 Inhibitor                | 0.70       |
| 356559-13-2 | TGF- $\beta$ RI Inhibitor III              | 0.67       | 186692-46-6 | Roscovitine                       | 0.70       |
| 174709-30-9 | BPIQ-I                                     | 0.67       | 865362-74-9 | ERK Inhibitor II, FR180204        | 0.70       |
| 347155-76-4 | PDGF RTK Inhibitor                         | 0.67       | 127191-97-3 | KN-62                             | 0.70       |
| 301305-73-7 | Flt-3 Inhibitor                            | 0.67       | 183319-69-9 | Erlotinib                         | 0.70       |
| 345987-15-7 | JNK Inhibitor V                            | 0.67       | 142273-20-9 | Kenpaullone                       | 0.70       |



| CAS #       | Inhibitor name                    | Gini score | CAS #       | Inhibitor name                                  | Gini score |
|-------------|-----------------------------------|------------|-------------|-------------------------------------------------|------------|
| 487021-52-3 | GSK-3b Inhibitor VIII             | 0.70       | 913844-45-8 | Rho Kinase Inhibitor IV                         | 0.74       |
| 444731-52-6 | Pazopanib                         | 0.71       | 152121-47-6 | SB 203580                                       | 0.74       |
| 7272-84-6   | Rho Kinase Inhibitor III, Rockout | 0.71       | 305350-87-2 | MEK1/2 Inhibitor                                | 0.74       |
| 318480-82-9 | SC-68376                          | 0.71       | 623163-52-0 | MEK Inhibitor II                                | 0.74       |
| 41179-33-3  | MK2a Inhibitor                    | 0.71       | 587871-26-9 | ATM Kinase Inhibitor                            | 0.74       |
| 65678-07-1  | AG 1024                           | 0.71       | 120166-69-0 | Diacylglycerol Kinase Inhibitor II              | 0.74       |
| 478482-75-6 | GSK-3b Inhibitor II               | 0.71       | 302962-49-8 | Dasatinib                                       | 0.74       |
| 52029-86-4  | STO-609                           | 0.72       | 226717-28-8 | AGL 2043                                        | 0.75       |
| 53123-88-9  | Rapamycin                         | 0.72       | 172747-50-1 | SB 202474, Negative control for p38 MAPK        | 0.75       |
| 5812-07-7   | DMBI                              | 0.72       | 905973-89-9 | ATM/ATR Kinase Inhibitor                        | 0.75       |
| 784211-09-2 | Cdk/Crk Inhibitor                 | 0.72       | 443913-73-3 | Vandetanib                                      | 0.75       |
| 404009-46-7 | DNA-PK Inhibitor V                | 0.72       | 870483-87-7 | cFMS Receptor Tyrosine Kinase Inhibitor         | 0.75       |
| 745833-23-2 | VX-702                            | 0.73       | 35943-35-2  | Akt Inhibitor V, Triciribine                    | 0.75       |
| 894804-07-0 | JNK Inhibitor VIII                | 0.73       | 312917-14-9 | JNK Inhibitor IX                                | 0.75       |
| 545380-34-5 | NF-kB Activation Inhibitor        | 0.73       | 213743-31-8 | Lck Inhibitor                                   | 0.75       |
| 212141-51-0 | Vatalanib                         | 0.73       | 72873-74-6  | SKF-86002                                       | 0.75       |
| 312636-16-1 | Sphingosine Kinase Inhibitor      | 0.73       | 612847-09-3 | Akt Inhibitor VIII, Isozyme-Selective, Akti-1/2 | 0.75       |
| 404009-40-1 | DNA-PK Inhibitor III              | 0.73       | 151342-35-7 | Ro-32-0432                                      | 0.76       |
| 477600-75-2 | Tofacitinib                       | 0.73       | 152121-30-7 | SB 202190                                       | 0.76       |
| 154447-35-5 | DNA-PK Inhibitor II               | 0.73       | 220127-57-1 | Imatinib                                        | 0.77       |
| 297744-42-4 | MEK Inhibitor I                   | 0.74       | 925681-41-0 | Akt Inhibitor X                                 | 0.77       |

| CAS #       | Inhibitor name               | Gini score |
|-------------|------------------------------|------------|
| 165806-53-1 | SB220025                     | 0.77       |
| 231277-92-2 | Lapatinib                    | 0.77       |
| 641571-10-0 | Nilotinib                    | 0.78       |
| 879127-07-8 | EGFR Inhibitor               | 0.78       |
| 179248-59-0 | Src Kinase Inhibitor I       | 0.78       |
| 387867-13-2 | Tandutinib                   | 0.78       |
| 284461-73-0 | Sorafenib                    | 0.79       |
| 179248-61-4 | EGFR/ErbB-2 Inhibitor        | 0.79       |
| 881001-19-0 | EGFR/ErbB-2/ErbB-4 Inhibitor | 0.79       |
| 790299-79-5 | Masitinib                    | 0.81       |
